# Supplementary material for: Pan-cancer analysis of differential DNA methylation patterns
Source: PubMed Central journal article supplement (PMC7579968; doi:10.1186/s12920-020-00780-3), 2020-10-22
Supplement: 12920_2020_780_MOESM1_ESM.pdf [file 12920_2020_780_MOESM1_ESM.pdf]

# Supplementary Materials for “Pan-cancer analysis of differential DNA methylation patterns”

Mai Shi<sup>1</sup>, Stephen Kwok-Wing Tsui<sup>1,2</sup>, Hao Wu<sup>3</sup> and Yingying Wei<sup>4\*</sup>

<sup>1</sup> School of Biomedical Sciences, The Chinese University of Hong Kong, Shatin, New Territories,  
Hong Kong SAR, China

<sup>2</sup> Hong Kong Bioinformatics Centre, The Chinese University of Hong Kong, Shatin, New Territories,  
Hong Kong SAR, China

<sup>3</sup> Department of Biostatistics and Bioinformatics, Rollins School of Public Health, Emory  
University, 1518 Clifton Road, Atlanta, Georgia 30322, USA

<sup>4</sup> Department of Statistics, The Chinese University of Hong Kong, Shatin, New Territories, Hong  
Kong SAR, China

\*To whom correspondence should be addressed.

Email: [ywei@sta.cuhk.edu.hk](mailto:ywei@sta.cuhk.edu.hk) (YW)

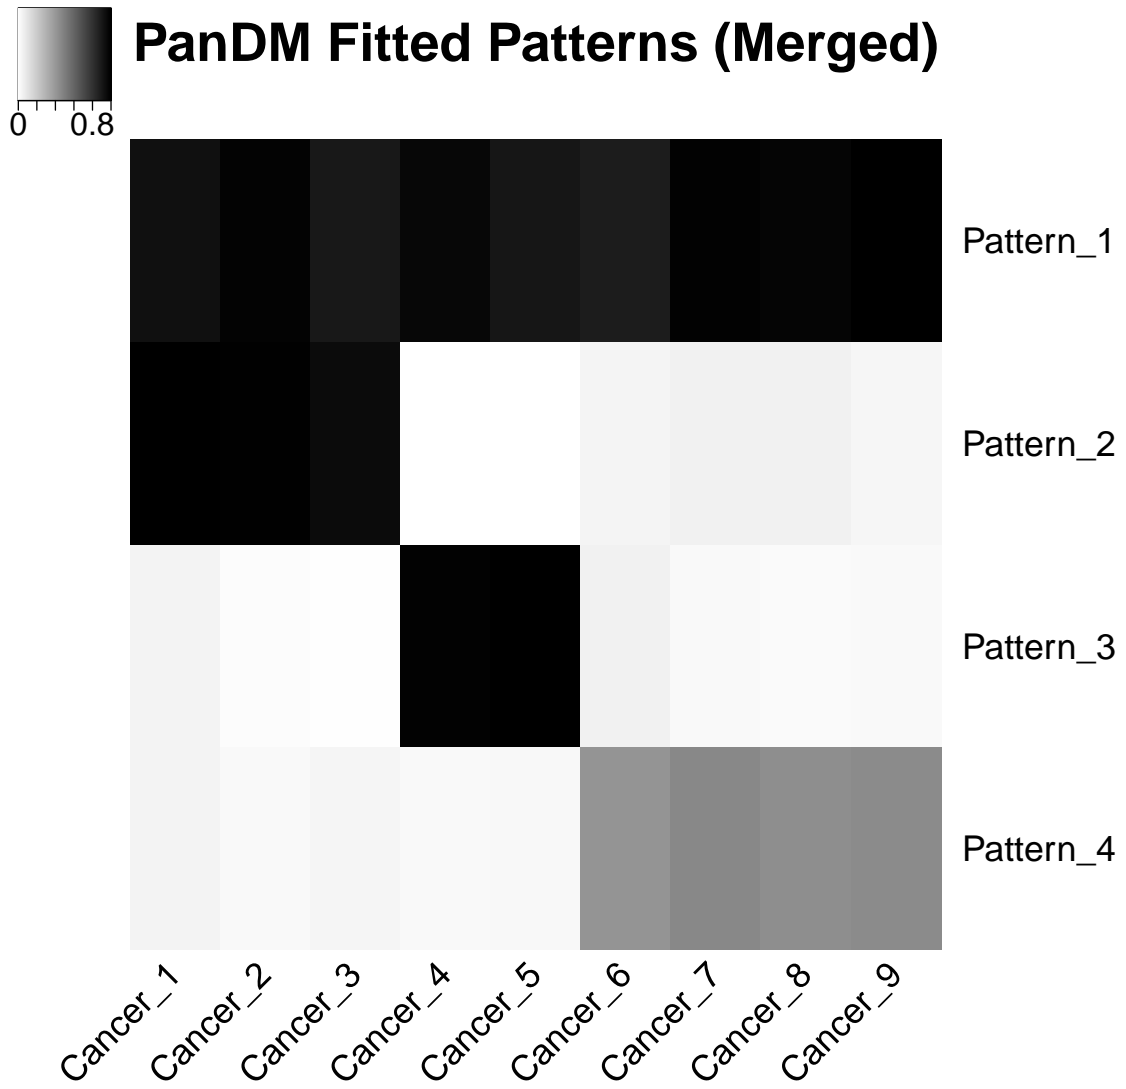

**Figure S1:** DM patterns learned by PanDM when  $K = 4$ . PanDM can still recover the major patterns with two true clusters merged due to a smaller  $K$ .

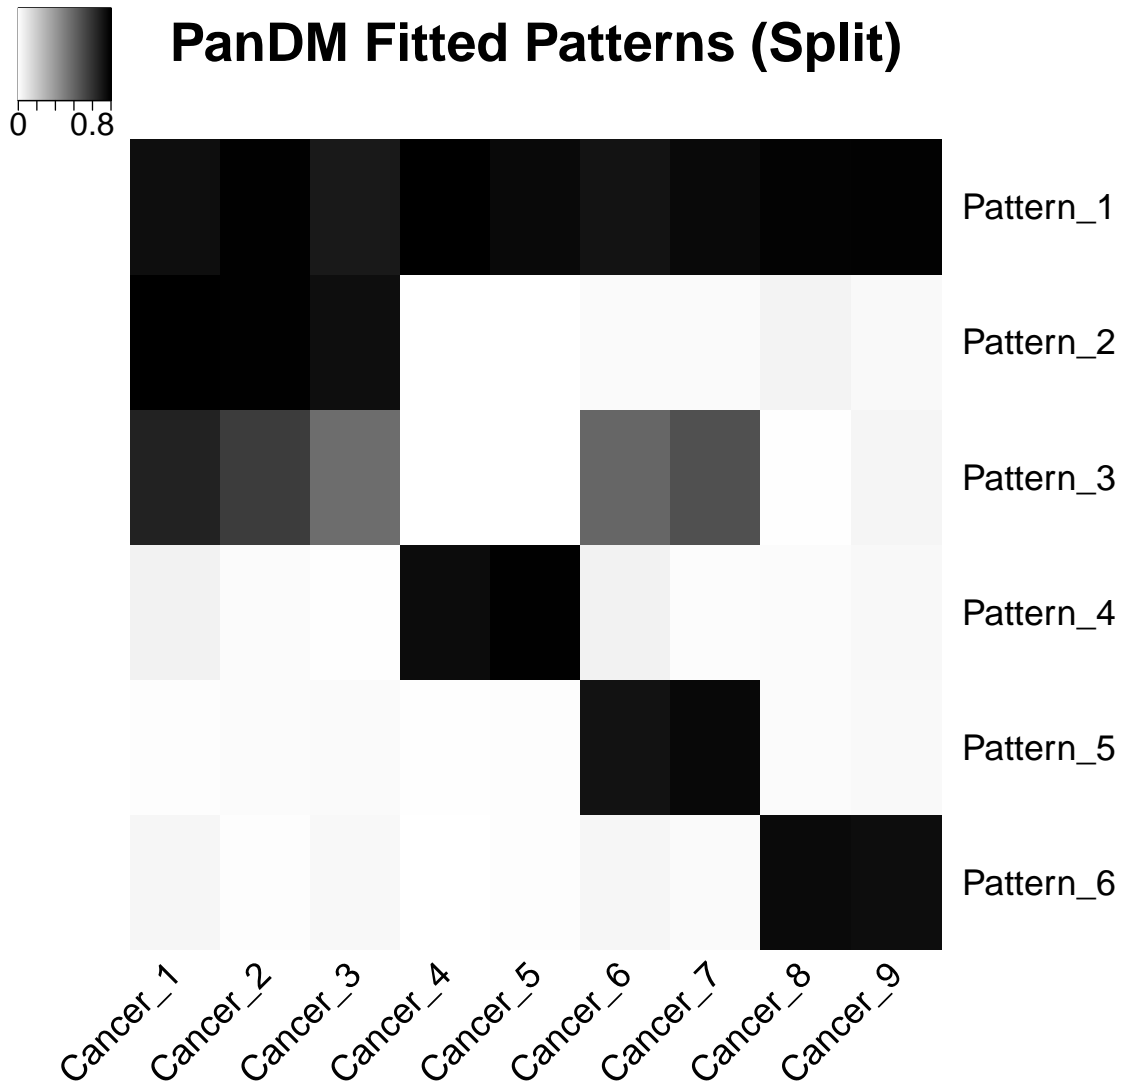

**Figure S2:** DM patterns learned by PanDM when  $K = 6$ . PanDM can still recover the major patterns with one true cluster split into two due to a larger  $K$ .

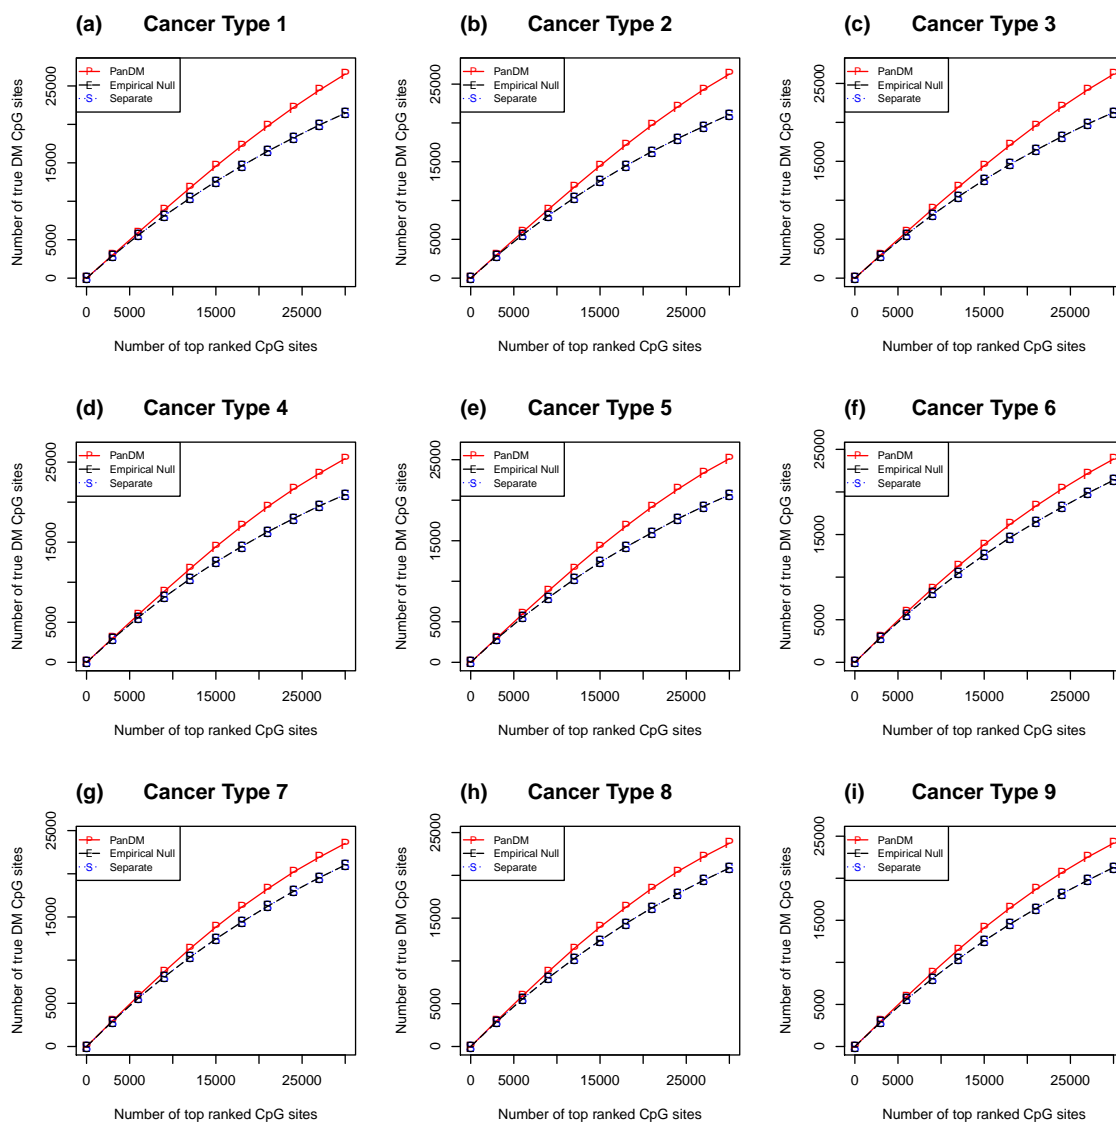

**Figure S3:** The number of true positives among the top ranked CpG sites by each of the three DM calling methods ( $K = 4$ ).

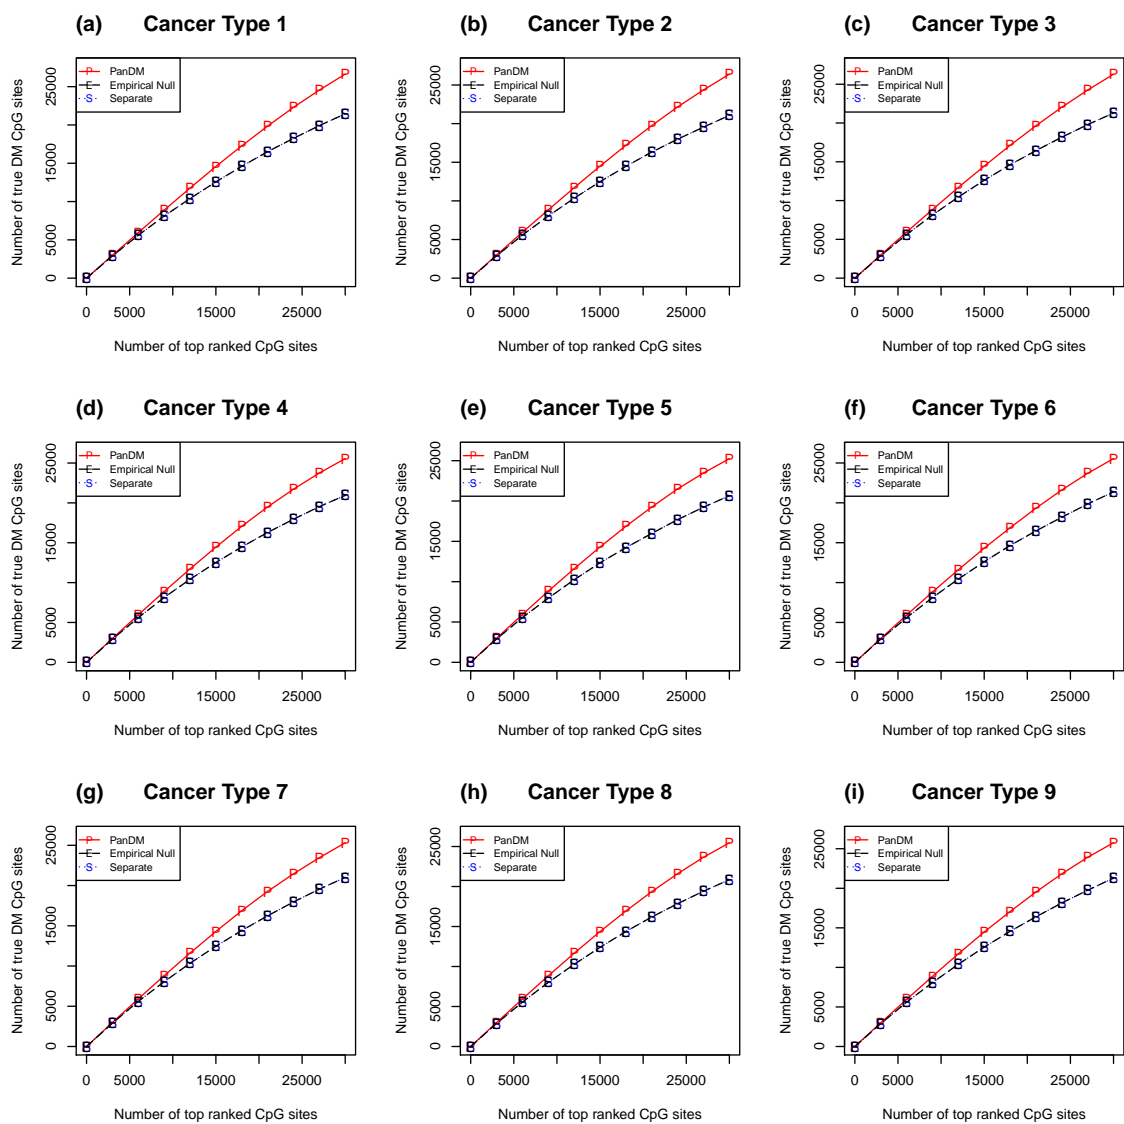

**Figure S4:** The number of true positives among the top ranked CpG sites by each of the three DM calling methods ( $K = 6$ ).

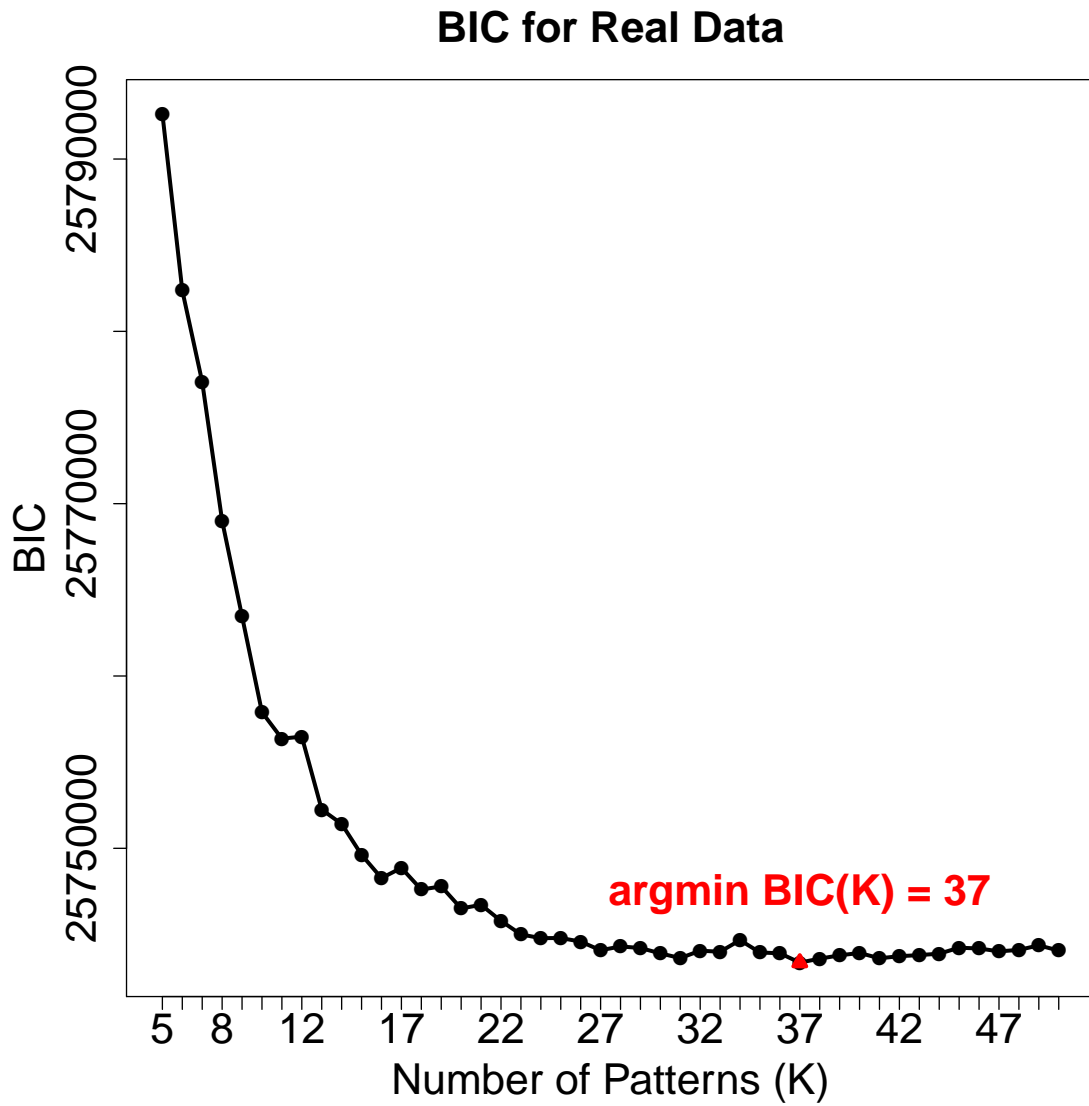

**Figure S5:** BIC plot for PanDM from  $K = 5$  to  $K = 50$  on the real TCGA data. The optimal number of patterns is achieved at  $K = 37$ .

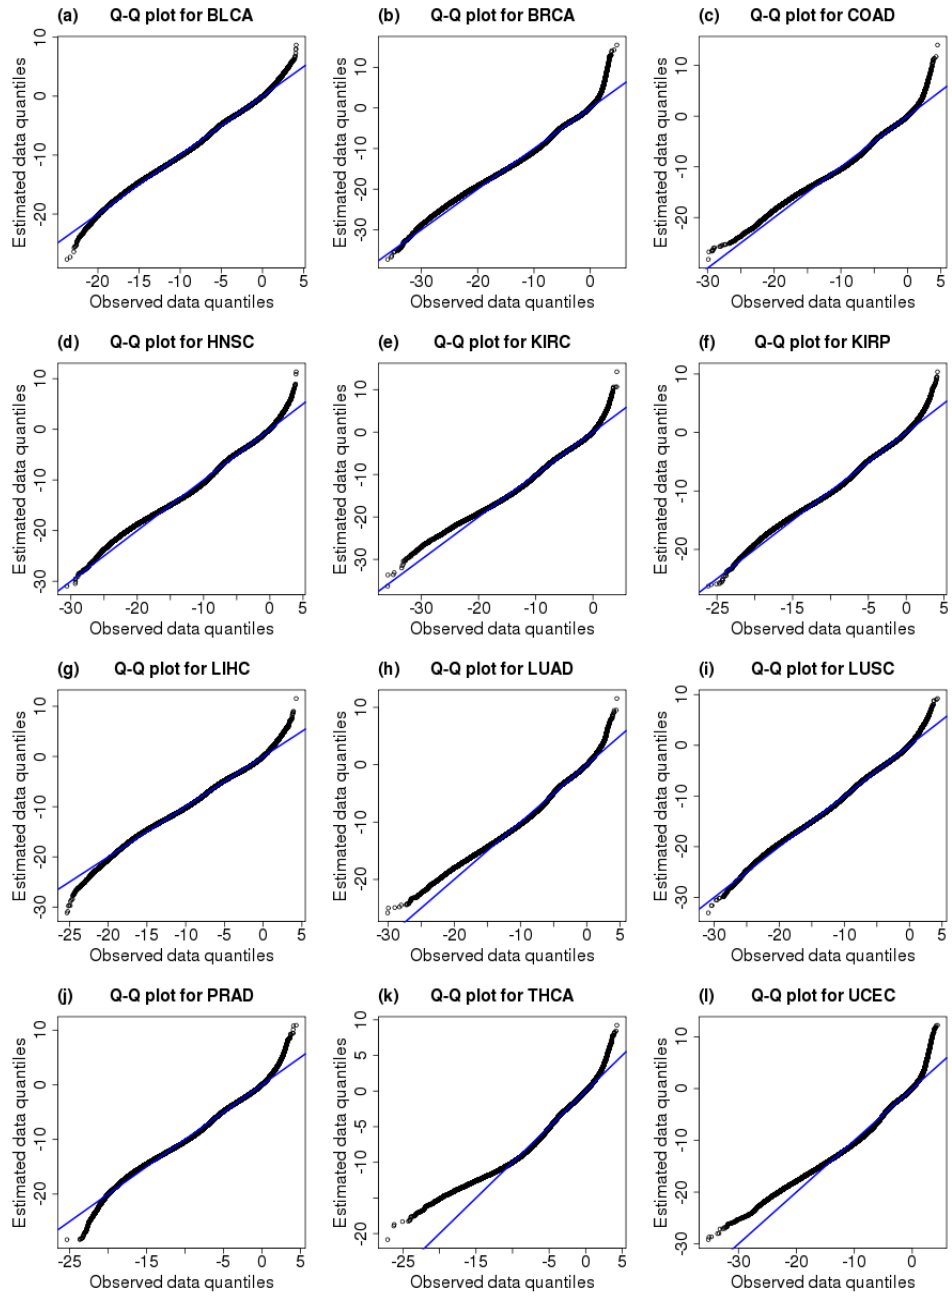

**Figure S6:** The Q-Q plots for the fitted two-normal mixture versus the real observed tumor-purity-adjusted  $p$ -values for the 12 cancer types. The two-normal-mixture distributions estimated by PanDM approximate the marginal distributions of the real data for each cancer type.

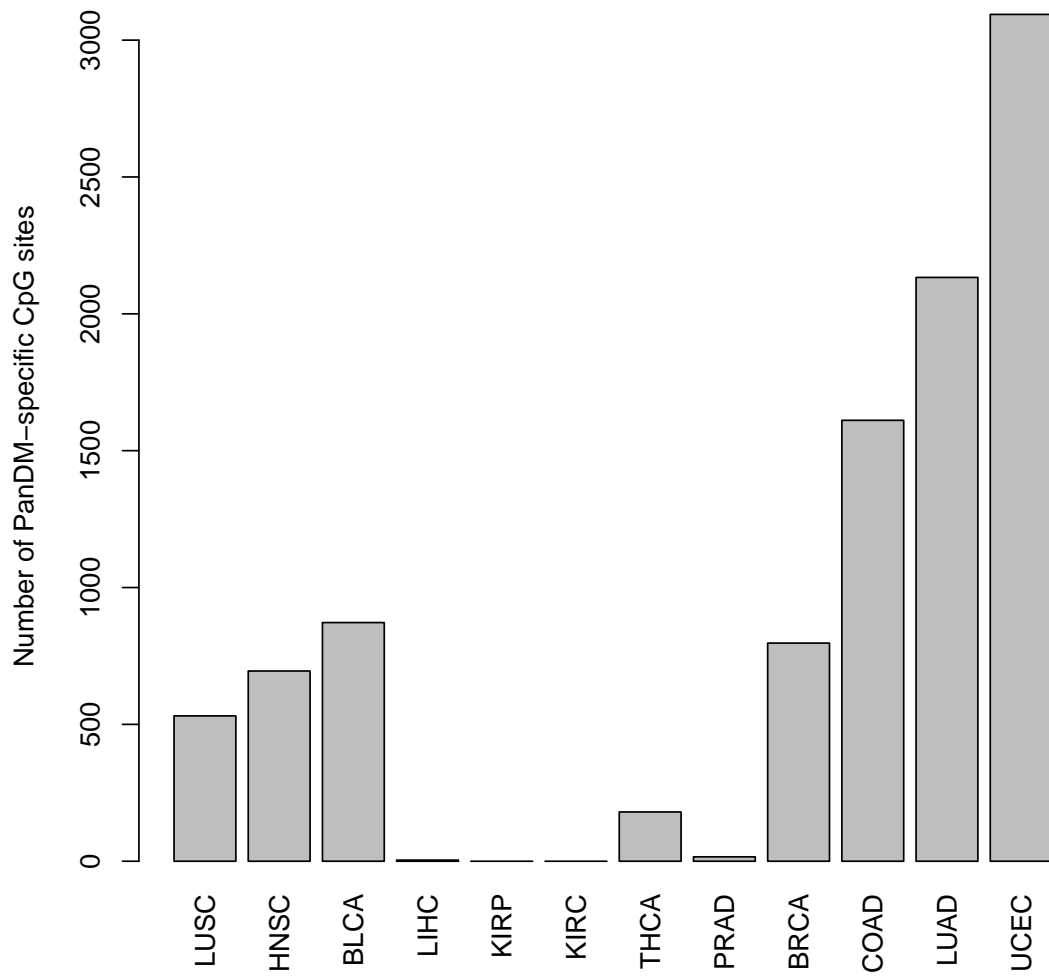

**Figure S7:** The number of *PanDM-specific CpG sites* identified by PanDM for each cancer type.



|               | Pattern_1 | Pattern_2    | Pattern_3   | Pattern_4   | Pattern_5   |
|---------------|-----------|--------------|-------------|-------------|-------------|
| Cancer Type 1 | 0.9640553 | 0.9937337829 | 0.037717760 | 0.032342679 | 0.036211529 |
| Cancer Type 2 | 0.9717475 | 0.9754921899 | 0.015203595 | 0.027598088 | 0.013546449 |
| Cancer Type 3 | 0.9550829 | 0.9729307110 | 0.009290200 | 0.042754384 | 0.031283340 |
| Cancer Type 4 | 0.9885332 | 0.0027810807 | 0.980356958 | 0.008596652 | 0.009299093 |
| Cancer Type 5 | 0.9509524 | 0.0056652081 | 0.997580770 | 0.008356333 | 0.016203526 |
| Cancer Type 6 | 0.9666804 | 0.0276856776 | 0.045967708 | 0.970397170 | 0.037388361 |
| Cancer Type 7 | 0.9623813 | 0.0259272073 | 0.017135646 | 0.966841092 | 0.006880510 |
| Cancer Type 8 | 0.9914880 | 0.0288545207 | 0.003961512 | 0.002294950 | 0.951082681 |
| Cancer Type 9 | 0.9976509 | 0.0009530388 | 0.020211276 | 0.034982872 | 0.968326663 |
| $\pi_k$       | 0.1774794 | 0.2082994    | 0.1993051   | 0.2091758   | 0.2057403   |

**Table S1:** The numerals of pattern matrix  $(q_{kc})_{K \times C}$  and cluster proportion  $\pi_k$  for the simulation data.

|               | $\mu_{c0}$ | $\mu_{c1}$ | $\sigma_{c0}$ | $\sigma_{c1}$ |
|---------------|------------|------------|---------------|---------------|
| Cancer Type 1 | -2.016618  | -4.992856  | 2.503145      | 2.999790      |
| Cancer Type 2 | -1.984987  | -4.999668  | 2.515327      | 2.986184      |
| Cancer Type 3 | -1.995867  | -5.013170  | 2.508411      | 3.005545      |
| Cancer Type 4 | -2.001477  | -5.006255  | 2.482651      | 3.002497      |
| Cancer Type 5 | -2.013811  | -4.995807  | 2.504003      | 2.998829      |
| Cancer Type 6 | -2.010875  | -5.000102  | 2.501666      | 3.018658      |
| Cancer Type 7 | -2.000757  | -5.000083  | 2.501637      | 2.998386      |
| Cancer Type 8 | -2.011726  | -4.996300  | 2.510085      | 2.992835      |
| Cancer Type 9 | -1.985461  | -4.990566  | 2.498068      | 2.985486      |

**Table S2:** The numeral setting of the distributions for the simulation data.

| Cancer type                           | TCGA code | # Tumor samples | # Normal samples |
|---------------------------------------|-----------|-----------------|------------------|
| Bladder urothelial carcinoma          | BLCA      | 419             | 21               |
| Breast invasive carcinoma             | BRCA      | 746             | 96               |
| Colon adenocarcinoma                  | COAD      | 301             | 38               |
| Head and neck squamous cell carcinoma | HNSC      | 530             | 50               |
| Kidney renal clear cell carcinoma     | KIRC      | 325             | 160              |
| Kidney renal papillary cell carcinoma | KIRP      | 276             | 45               |
| Liver hepatocellular carcinoma        | LIHC      | 380             | 50               |
| Lung adenocarcinoma                   | LUAD      | 466             | 32               |
| Lung squamous cell carcinoma          | LUSC      | 359             | 42               |
| Prostate adenocarcinoma               | PRAD      | 429             | 50               |
| Thyroid carcinoma                     | THCA      | 515             | 56               |
| Uterine corpus endometrial carcinoma  | UCEC      | 439             | 34               |

**Table S3:** Overview of the detailed cancer types and number of samples collected from the Genomic Data Commons Data Portal (<https://gdc-portal.nci.nih.gov/>) for real data analysis.
