# Supplementary material for: Pan-cancer analysis of differential DNA methylation patterns
Source: BMC Med Genomics. 2020 Oct 22;13(Suppl 10):154. doi: 10.1186/s12920-020-00780-3 (PMC7579968; doi:10.1186/s12920-020-00780-3)
Supplement: Supplementary file 3 — Additional file 3 Table S5A. Enrichment results of functional analysis using the GREAT tool for PanDM cluster 33 (FDRs are smaller than 0.05 for both the binomial and hypergeometric-distribution-based tests). (Excel) [file 12920_2020_780_MOESM3_ESM.xlsx]

## Sheet: Sheet1
PanDM Cluster	Ontology	# Term Name	Binom Rank	Binom Raw P-Value	Binom FDR Q-Val	Binom Fold Enrichment	Binom Observed Region Hits	Binom Region Set Coverage	Hyper Rank	Hyper FDR Q-Val	Hyper Fold Enrichment	Hyper Observed Gene Hits	Hyper Total Genes	Hyper Gene Set Coverage
33	GO Molecular Function	structural constituent of ribosome	2	1.16890e-198	2.15545e-195	2.0864	2081	1.69%	47	1.55504e-9	1.1668	159	159	1.03%
		unfolded protein binding	7	2.32654e-187	1.22576e-184	2.4631	1376	1.12%	90	2.77276e-3	1.1420	92	94	0.60%
		ribonucleoprotein complex binding	11	9.55002e-128	3.20186e-125	2.4494	945	0.77%	92	3.22809e-3	1.1668	61	61	0.39%
		DNA-directed RNA polymerase activity	24	8.43083e-99	1.29554e-96	2.5473	676	0.55%	127	3.78942e-2	1.1668	43	43	0.28%
	GO Biological Process	nuclear-transcribed mRNA catabolic process	28	6.32618e-216	2.35876e-213	2.0300	2418	1.96%	167	1.19676e-10	1.1668	174	174	1.13%
		translational initiation	31	5.63562e-193	1.89793e-190	2.0835	2028	1.65%	271	1.63113e-6	1.1509	145	147	0.94%
		viral gene expression	38	2.17187e-171	5.96694e-169	2.4440	1277	1.04%	312	1.38685e-5	1.1668	95	95	0.61%
		translational elongation	40	5.58608e-168	1.45797e-165	2.2124	1537	1.25%	258	1.02596e-6	1.1668	113	113	0.73%
		nuclear-transcribed mRNA catabolic process, nonsense-mediated decay	43	4.62760e-165	1.12354e-162	2.1585	1596	1.30%	246	4.23684e-7	1.1668	119	119	0.77%
		DNA-dependent transcription, elongation	44	4.07387e-164	9.66618e-162	2.3529	1318	1.07%	439	6.13953e-4	1.1532	85	86	0.55%
		antigen processing and presentation of exogenous peptide antigen via MHC class I	48	6.61729e-158	1.43926e-155	2.4734	1149	0.93%	627	9.48032e-3	1.1369	76	78	0.49%
		antigen processing and presentation of peptide antigen via MHC class I	49	8.14794e-157	1.73601e-154	2.2253	1416	1.15%	538	3.41030e-3	1.1318	97	100	0.63%
		antigen processing and presentation of exogenous peptide antigen via MHC class I, TAP-dependent	51	3.57639e-156	7.32107e-154	2.4994	1114	0.91%	674	1.48604e-2	1.1353	72	74	0.47%
		transcription elongation from RNA polymerase II promoter	53	2.38844e-150	4.70478e-148	2.5196	1056	0.86%	452	8.57553e-4	1.1668	66	66	0.43%
		translational termination	58	7.69866e-147	1.38576e-144	2.3462	1185	0.96%	336	3.26612e-5	1.1668	89	89	0.58%
		viral transcription	63	6.37713e-143	1.05678e-140	2.3739	1126	0.91%	354	5.76427e-5	1.1668	85	85	0.55%
		cotranslational protein targeting to membrane	73	4.48079e-135	6.40814e-133	2.0523	1470	1.19%	270	1.56213e-6	1.1668	110	110	0.71%
		SRP-dependent cotranslational protein targeting to membrane	74	1.46155e-134	2.06197e-132	2.0623	1447	1.18%	277	2.07715e-6	1.1668	108	108	0.70%
		nuclear export	75	5.74306e-134	7.99434e-132	2.0251	1507	1.22%	635	9.98568e-3	1.1210	98	102	0.63%
		signal transduction involved in DNA damage checkpoint	81	1.23785e-129	1.59545e-127	2.3493	1042	0.85%	756	2.86964e-2	1.1325	66	68	0.43%
		DNA damage response, signal transduction by p53 class mediator resulting in cell cycle arrest	85	2.34283e-126	2.87754e-124	2.3340	1029	0.84%	768	3.20915e-2	1.1320	65	67	0.42%
		positive regulation of viral transcription	92	1.00324e-121	1.13846e-119	2.4312	913	0.74%	567	4.38160e-3	1.1668	54	54	0.35%
		tRNA processing	97	2.72631e-118	2.93429e-116	2.0719	1256	1.02%	336	3.26612e-5	1.1668	89	89	0.58%
		mitotic G1 DNA damage checkpoint	104	4.59584e-112	4.61352e-110	2.0813	1176	0.96%	665	1.32257e-2	1.1357	73	75	0.47%
	GO Cellular Component	ribosomal subunit	30	7.93182e-187	3.34458e-185	2.1484	1827	1.48%	52	3.55921e-7	1.1583	136	137	0.88%
		mitochondrial ribosome	35	7.39568e-153	2.67301e-151	2.8638	860	0.70%	112	2.68774e-3	1.1668	54	54	0.35%
		catalytic step 2 spliceosome	40	1.54772e-121	4.89468e-120	2.0872	1268	1.03%	77	8.13935e-5	1.1668	79	79	0.51%
		large ribosomal subunit	45	1.02691e-113	2.88675e-112	2.2286	1020	0.83%	81	1.43817e-4	1.1668	75	75	0.49%
		small ribosomal subunit	67	4.26593e-79	8.05433e-78	2.0770	829	0.67%	128	6.74430e-3	1.1483	62	63	0.40%
		cytosolic large ribosomal subunit	72	5.37468e-76	9.44301e-75	2.1930	701	0.57%	114	3.08254e-3	1.1668	53	53	0.34%
		nucleoid	77	7.08158e-74	1.16340e-72	2.2895	620	0.50%	136	1.65372e-2	1.1668	41	41	0.27%
		mitochondrial nucleoid	81	2.92517e-72	4.56833e-71	2.2879	607	0.49%	139	1.88861e-2	1.1668	40	40	0.26%
		integral to mitochondrial membrane	124	2.56881e-42	2.62060e-41	2.0208	465	0.38%	165	4.69516e-2	1.1668	33	33	0.21%
	MSigDB Pathway	Genes involved in Metabolism of RNA	1	0.00000	0.00000	2.0486	3559	2.89%	2	2.16185e-12	1.1578	257	259	1.66%
		Genes involved in mRNA Splicing	3	7.46039e-321	3.28257e-318	3.0880	1613	1.31%	15	5.66443e-6	1.1668	107	107	0.69%
		Genes involved in Metabolism of mRNA	4	2.10490e-315	6.94617e-313	2.1835	2970	2.41%	5	6.76831e-10	1.1559	212	214	1.37%
		Genes involved in Transcription	5	1.61685e-298	4.26848e-296	2.2985	2518	2.05%	56	1.15208e-3	1.1033	191	202	1.24%
		Genes involved in Processing of Capped Intron-Containing Pre-mRNA	6	8.34863e-297	1.83670e-294	2.5827	1998	1.62%	8	1.17250e-7	1.1668	136	136	0.88%
		Genes involved in mRNA Processing	8	3.97153e-263	6.55303e-261	2.2903	2237	1.82%	6	8.12807e-9	1.1668	155	155	1.00%
		Genes involved in HIV Infection	9	4.08243e-259	5.98756e-257	2.0362	2878	2.34%	25	4.05203e-5	1.1247	187	194	1.21%
		Spliceosome	11	2.33391e-243	2.80069e-241	2.3983	1884	1.53%	12	4.32266e-7	1.1668	125	125	0.81%
		Genes involved in Influenza Life Cycle	12	4.44251e-223	4.88676e-221	2.2588	1953	1.59%	7	1.14699e-7	1.1668	137	137	0.89%
		Genes involved in RNA Polymerase II Transcription	13	4.01353e-219	4.07528e-217	2.5427	1517	1.23%	21	1.02685e-5	1.1668	101	101	0.65%
		Genes involved in Elongation arrest and recovery	14	4.78165e-201	4.50841e-199	4.8871	577	0.47%	230	4.78777e-2	1.1668	31	31	0.20%
		Genes involved in Cell Cycle Checkpoints	15	5.94494e-187	5.23155e-185	2.1526	1820	1.48%	23	2.90810e-5	1.1565	112	113	0.72%
		Genes involved in Influenza Viral RNA Transcription and Replication	17	3.48391e-180	2.70515e-178	2.3979	1394	1.13%	19	9.71784e-6	1.1668	102	102	0.66%
		Genes involved in Late Phase of HIV Life Cycle	18	1.34388e-177	9.85511e-176	2.2499	1567	1.27%	22	1.14473e-5	1.1668	100	100	0.65%
		Genes involved in Translation	19	2.05978e-174	1.43101e-172	2.0401	1929	1.57%	11	3.96650e-7	1.1589	146	147	0.94%
		Genes involved in mRNA Splicing - Minor Pathway	20	2.27957e-171	1.50452e-169	4.1113	591	0.48%	148	1.35851e-2	1.1668	42	42	0.27%
		Genes involved in Nonsense Mediated Decay Enhanced by the Exon Junction Complex	21	7.80521e-170	4.90613e-168	2.3274	1395	1.13%	15	5.66443e-6	1.1668	107	107	0.69%
		Genes involved in HIV Life Cycle	22	1.89935e-169	1.13961e-167	2.0890	1769	1.44%	23	2.90810e-5	1.1565	112	113	0.72%
		Genes involved in ER-Phagosome pathway	24	6.07647e-164	3.34206e-162	2.7318	998	0.81%	131	1.04638e-2	1.1473	59	60	0.38%
		Genes involved in Formation of RNA Pol II elongation complex	25	5.20032e-155	2.74577e-153	3.2741	713	0.58%	148	1.35851e-2	1.1668	42	42	0.27%
