# Supplementary material for: Pan-cancer analysis of differential DNA methylation patterns
Source: BMC Med Genomics. 2020 Oct 22;13(Suppl 10):154. doi: 10.1186/s12920-020-00780-3 (PMC7579968; doi:10.1186/s12920-020-00780-3)
Supplement: Supplementary file 4 — Additional file 4 Table S5B. Enrichment results of functional analysis using the GREAT tool for the remaining 36 PanDM clusters (FDRs are smaller than 0.05; folds of enrichment are larger than 2 for both the binomial and hypergeometric-distribution-based tests). (Excel) [file 12920_2020_780_MOESM4_ESM.xlsx]

## Sheet: Sheet1
PanDM Cluster	Ontology	# Term Name	Binom Rank	Binom Raw P-Value	Binom FDR Q-Val	Binom Fold Enrichment	Binom Observed Region Hits	Binom Region Set Coverage	Hyper Rank	Hyper FDR Q-Val	Hyper Fold Enrichment	Hyper Observed Gene Hits	Hyper Total Genes	Hyper Gene Set Coverage
1	GO Molecular Function	gap junction channel activity	15	8.75772e-8	2.15323e-5	6.9987	13	0.72%	7	1.57032e-2	5.2976	8	14	0.41%
	GO Biological Process	keratinization	2	7.66237e-18	3.99976e-14	10.1479	26	1.44%	73	1.29991e-6	4.1204	20	45	1.03%
		keratinocyte differentiation	7	4.39491e-15	6.55469e-12	3.9544	48	2.66%	120	4.37298e-5	2.7812	27	90	1.39%
		epidermal cell differentiation	8	5.38187e-15	7.02334e-12	2.9325	71	3.94%	85	3.39674e-6	2.6488	36	126	1.85%
		skin development	11	4.75299e-13	4.51102e-10	2.0483	120	6.66%	71	1.25315e-6	2.0934	63	279	3.24%
		positive regulation of cell fate specification	13	6.16628e-13	4.95199e-10	16.2372	14	0.78%	259	5.44169e-3	9.2708	4	4	0.21%
		epidermis development	18	6.73268e-11	3.90495e-8	2.0075	103	5.71%	80	2.14431e-6	2.1481	57	246	2.93%
		negative regulation of lipid biosynthetic process	25	6.75428e-10	2.82059e-7	3.9204	30	1.66%	209	1.92272e-3	3.4434	13	35	0.67%
		cyclic purine nucleotide metabolic process	28	9.85822e-10	3.67571e-7	3.9685	29	1.61%	219	2.26054e-3	3.5887	12	31	0.62%
		cyclic nucleotide biosynthetic process	29	1.10796e-9	3.98865e-7	3.9476	29	1.61%	232	3.08056e-3	3.4766	12	32	0.62%
		negative regulation of steroid biosynthetic process	39	9.53927e-9	2.55359e-6	4.3592	23	1.28%	207	1.91727e-3	4.6354	9	18	0.46%
		negative regulation of steroid metabolic process	41	1.41147e-8	3.59408e-6	4.2653	23	1.28%	252	4.44945e-3	4.1719	9	20	0.46%
		positive regulation of gastrulation	52	7.31348e-8	1.46832e-5	4.8801	18	1.00%	390	3.37223e-2	5.1505	5	9	0.26%
		embryonic cranial skeleton morphogenesis	63	1.58043e-7	2.61900e-5	2.7179	36	2.00%	213	2.06964e-3	3.2448	14	40	0.72%
		positive regulation of cerebellar granule cell precursor proliferation	65	1.89661e-7	3.04625e-5	5.5205	15	0.83%	390	3.37223e-2	5.1505	5	9	0.26%
		negative regulation of lipid metabolic process	70	2.49673e-7	3.72369e-5	2.8630	32	1.77%	398	3.72624e-2	2.3177	15	60	0.77%
		regulation of cerebellar granule cell precursor proliferation	74	4.23802e-7	5.97904e-5	4.8393	16	0.89%	352	2.40698e-2	4.6354	6	12	0.31%
		cerebellar Purkinje cell-granule cell precursor cell signaling involved in regulation of granule cell precursor cell proliferation	82	9.32574e-7	1.18733e-4	6.2123	12	0.67%	417	4.23558e-2	6.1805	4	6	0.21%
		neural tube patterning	83	1.04216e-6	1.31087e-4	2.9733	27	1.50%	96	6.66385e-6	4.4949	16	33	0.82%
		dorsal spinal cord development	87	1.46731e-6	1.76077e-4	3.6202	20	1.11%	211	1.96087e-3	4.2140	10	22	0.51%
		embryonic skeletal system morphogenesis	88	1.52363e-6	1.80758e-4	2.0849	51	2.83%	98	8.29794e-6	2.9498	28	88	1.44%
	GO Cellular Component	connexon complex	4	4.56266e-7	1.44294e-4	5.5442	14	0.78%	11	1.95505e-2	3.9732	9	21	0.46%
		cornified envelope	6	9.34390e-7	1.97001e-4	5.2124	14	0.78%	1	1.88152e-3	5.0989	11	20	0.57%
	Disease Ontology	sensorineural hearing loss	34	2.27026e-4	1.49237e-2	2.6686	18	1.00%	58	4.10828e-2	2.5643	13	47	0.67%
		inner ear disease	47	6.12804e-4	2.91408e-2	2.1307	24	1.33%	25	3.21258e-3	2.7099	19	65	0.98%
2	GO Molecular Function	receptor signaling protein tyrosine kinase activity	16	8.67598e-6	1.99981e-3	3.6255	17	0.60%	20	6.88627e-3	5.3516	7	9	0.27%
		vascular endothelial growth factor-activated receptor activity	41	4.12105e-4	3.70694e-2	2.9540	14	0.50%	23	9.21741e-3	5.8977	6	7	0.23%
	GO Biological Process	actin crosslink formation	13	1.88528e-8	1.51402e-5	9.0059	12	0.43%	515	9.02676e-3	6.8806	4	4	0.15%
		collagen fibril organization	15	2.53997e-8	1.76782e-5	2.7533	40	1.42%	768	4.38679e-2	2.2362	13	40	0.50%
		regulation of cell growth by extracellular stimulus	19	8.03578e-8	4.41545e-5	10.3504	10	0.35%	753	4.25204e-2	6.8806	3	3	0.11%
		negative regulation of cardiac muscle cell apoptotic process	23	2.63753e-7	1.19721e-4	4.0606	20	0.71%	725	3.54640e-2	4.3004	5	8	0.19%
		positive regulation of smooth muscle contraction	32	4.25520e-7	1.38826e-4	3.0485	28	0.99%	719	3.42039e-2	2.8148	9	22	0.34%
		spinal cord oligodendrocyte cell fate specification	39	5.38761e-7	1.44222e-4	8.3846	10	0.35%	753	4.25204e-2	6.8806	3	3	0.11%
		cardioblast differentiation	55	4.29656e-6	8.15565e-4	2.8890	25	0.89%	679	2.79672e-2	3.4403	7	14	0.27%
		regulation of Notch signaling pathway	87	1.69352e-5	2.03222e-3	2.2028	36	1.28%	533	1.03299e-2	2.4574	15	42	0.57%
		plasma lipoprotein particle remodeling	135	6.55105e-5	5.06614e-3	3.3637	15	0.53%	784	4.49597e-2	2.6924	9	23	0.34%
		filopodium assembly	154	9.65774e-5	6.54720e-3	2.9767	17	0.60%	525	9.91539e-3	3.1276	10	22	0.38%
		spinal cord association neuron differentiation	156	1.06993e-4	7.16029e-3	2.9508	17	0.60%	523	9.70357e-3	3.6697	8	15	0.31%
		negative regulation of Notch signaling pathway	162	1.27702e-4	8.22967e-3	3.0247	16	0.57%	781	4.43945e-2	2.8971	8	19	0.31%
		mammary gland alveolus development	163	1.29110e-4	8.26939e-3	2.3343	25	0.89%	564	1.22153e-2	3.2592	9	19	0.34%
		post-anal tail morphogenesis	171	1.53492e-4	9.37111e-3	2.7607	18	0.64%	701	3.27733e-2	3.0581	8	18	0.31%
		organ or tissue specific immune response	174	1.64488e-4	9.86929e-3	4.7276	9	0.32%	710	3.29409e-2	3.7531	6	11	0.23%
		oligodendrocyte development	175	1.84705e-4	1.10190e-2	2.1623	28	0.99%	481	6.25071e-3	2.7953	13	32	0.50%
		nose development	194	2.33989e-4	1.25920e-2	2.5830	19	0.67%	468	5.79916e-3	3.9318	8	14	0.31%
		positive regulation of dermatome development	195	2.34832e-4	1.25726e-2	9.3376	5	0.18%	753	4.25204e-2	6.8806	3	3	0.11%
		positive regulation of DNA binding	197	2.40443e-4	1.27423e-2	2.1607	27	0.96%	233	6.69851e-5	3.6860	15	28	0.57%
	Disease Ontology	mixed cell type cancer	1	6.37104e-12	1.42393e-8	3.0917	51	1.81%	104	3.92380e-4	2.8148	18	44	0.69%
		hemangioma	3	9.16279e-10	6.82628e-7	2.4413	60	2.13%	137	4.11864e-3	2.1625	22	70	0.84%
		peripheral nerve sheath neoplasm	5	2.77248e-9	1.23930e-6	2.7766	45	1.60%	99	3.84915e-4	2.9243	17	40	0.65%
		gastritis	9	1.27806e-8	3.17385e-6	2.7835	41	1.45%	152	6.63266e-3	2.1249	21	68	0.80%
		pleural tuberculosis	10	2.49150e-8	5.56851e-6	7.8233	13	0.46%	175	1.48260e-2	4.1284	6	10	0.23%
		pleurisy	11	3.55610e-8	7.22534e-6	7.5840	13	0.46%	226	3.88846e-2	3.4403	6	12	0.23%
		stomach disease	13	1.13969e-7	1.95938e-5	2.4654	44	1.56%	143	5.70798e-3	2.0387	24	81	0.92%
		cervical adenosquamous carcinoma	24	3.14238e-6	2.92634e-4	6.0984	11	0.39%	215	3.18809e-2	6.8806	3	3	0.11%
		fibrosarcoma of bone	27	5.57922e-6	4.61836e-4	7.3614	9	0.32%	215	3.18809e-2	6.8806	3	3	0.11%
		nerve sheath tumors	28	6.36839e-6	5.08334e-4	2.1062	44	1.56%	132	3.40317e-3	2.5602	16	43	0.61%
		atypical polypoid adenomyoma	31	1.41541e-5	1.02046e-3	5.7597	10	0.35%	215	3.18809e-2	6.8806	3	3	0.11%
		dengue disease	38	2.53170e-5	1.48904e-3	3.3273	17	0.60%	203	2.59350e-2	2.8148	9	22	0.34%
		fibrosarcoma	73	2.96634e-4	9.08189e-3	2.2483	24	0.85%	173	1.48114e-2	2.5802	12	32	0.46%
		neurilemmoma	77	3.21126e-4	9.32099e-3	2.2356	24	0.85%	74	5.18049e-5	4.0658	13	22	0.50%
		acoustic neuroma	89	5.16280e-4	1.29650e-2	2.8858	14	0.50%	61	9.10971e-6	6.1926	9	10	0.34%
		chronic myeloproliferative disease	91	5.41806e-4	1.33070e-2	2.0793	26	0.92%	245	4.81351e-2	2.2935	11	33	0.42%
		mullerian mixed tumor	104	8.35951e-4	1.79649e-2	3.2188	11	0.39%	198	2.22134e-2	5.5045	4	5	0.15%
		obsessive-compulsive disease	119	1.53891e-3	2.89030e-2	2.0608	22	0.78%	190	1.87732e-2	2.9488	9	21	0.34%
3	GO Molecular Function	RNA polymerase II core promoter proximal region sequence-specific DNA binding transcription factor activity involved in positive regulation of transcription	17	1.17370e-21	2.54624e-19	2.0835	207	3.34%	13	7.67004e-7	2.1509	46	74	0.88%
		RNA polymerase II transcription regulatory region sequence-specific DNA binding transcription factor activity involved in positive regulation of transcription	19	3.51315e-21	6.81921e-19	2.0465	211	3.40%	14	8.20729e-7	2.0932	49	81	0.94%
		14-3-3 protein binding	34	2.50368e-13	2.71576e-11	4.0455	41	0.66%	54	1.21763e-2	2.5951	12	16	0.23%
		chromatin DNA binding	66	5.70199e-9	3.18620e-7	2.2402	65	1.05%	23	9.26652e-5	2.4424	24	34	0.46%
		E-box binding	68	1.92185e-8	1.04232e-6	2.2831	58	0.94%	35	9.57731e-4	2.3863	20	29	0.38%
	GO Biological Process	cell fate commitment	26	6.40824e-52	2.57315e-49	2.0768	511	8.24%	17	1.34227e-23	2.1780	141	224	2.70%
		neuron fate commitment	58	7.09737e-39	1.27753e-36	2.8489	209	3.37%	147	3.41819e-9	2.3998	43	62	0.82%
		embryonic skeletal system morphogenesis	72	9.49328e-35	1.37653e-32	2.5921	218	3.52%	117	1.13847e-11	2.3198	59	88	1.13%
		embryonic skeletal system development	73	1.45293e-34	2.07789e-32	2.2716	279	4.50%	55	9.17664e-16	2.3363	79	117	1.52%
		cell differentiation in spinal cord	102	2.47932e-27	2.53765e-25	2.7207	156	2.52%	285	1.64436e-4	2.0761	30	50	0.58%
		dorsal spinal cord development	115	2.67207e-24	2.42578e-22	4.1065	78	1.26%	349	7.83780e-4	2.5164	16	22	0.31%
		spinal cord motor neuron cell fate specification	118	1.42172e-23	1.25786e-21	4.3968	70	1.13%	443	3.42293e-3	2.8834	10	12	0.19%
		forebrain neuron differentiation	120	3.88093e-23	3.37641e-21	2.4470	158	2.55%	279	1.27278e-4	2.1530	28	45	0.54%
		forebrain regionalization	125	4.27913e-22	3.57393e-20	3.4568	87	1.40%	456	3.82125e-3	2.4221	14	20	0.27%
		metanephric nephron development	127	1.50152e-21	1.23432e-19	2.7083	122	1.97%	248	2.50686e-5	2.4870	23	32	0.44%
	Disease Ontology	malignant neoplasm of lung	37	8.18771e-12	4.94582e-10	3.1652	49	0.79%	183	1.70078e-2	2.1062	14	23	0.27%
		arteriovenous malformation	153	2.12344e-6	3.10188e-5	4.2743	16	0.26%	207	3.30731e-2	2.9658	6	7	0.12%
		hypercalcemia	211	3.08559e-5	3.26839e-4	3.6042	15	0.24%	216	3.50021e-2	2.6912	7	9	0.13%
		vitreous disease	251	1.54212e-4	1.37317e-3	3.1092	15	0.24%	207	3.30731e-2	2.9658	6	7	0.12%
	PANTHER Pathway	Pyruvate metabolism	4	2.54901e-5	9.68624e-4	4.4588	12	0.19%	10	4.65598e-2	2.9658	6	7	0.12%
	MSigDB Pathway	Maturity onset diabetes of the young	3	2.96033e-18	1.30255e-15	3.2471	77	1.24%	19	1.94880e-2	2.2145	16	25	0.31%
		amb2 Integrin signaling	5	3.48189e-14	9.19219e-12	3.3381	56	0.90%	10	9.36523e-3	2.0254	24	41	0.46%
		Genes involved in Regulation of beta-cell development	7	5.15149e-13	9.71423e-11	2.4770	82	1.32%	21	2.35622e-2	2.0761	18	30	0.35%
		Class I PI3K signaling events	17	2.13661e-8	1.65902e-6	2.1603	65	1.05%	5	4.30307e-3	2.0069	29	50	0.56%
4	GO Molecular Function	sequence-specific DNA binding	1	1.07479e-173	3.96382e-170	2.1548	1488	20.14%	1	4.38421e-46	2.0589	343	697	7.95%
		transcription regulatory region sequence-specific DNA binding	4	2.59604e-110	2.39355e-107	2.9511	567	7.67%	8	6.80588e-12	2.1418	86	168	1.99%
		HMG box domain binding	15	1.50080e-24	3.68997e-22	3.7125	89	1.20%	55	3.34099e-3	2.8627	13	19	0.30%
		activating transcription factor binding	16	2.08685e-24	4.81020e-22	2.5346	157	2.12%	64	7.11218e-3	2.0115	25	52	0.58%
		E-box binding	17	3.00372e-24	6.51630e-22	3.3355	101	1.37%	37	1.32156e-3	2.5969	18	29	0.42%
		enhancer sequence-specific DNA binding	23	3.79133e-18	6.07931e-16	2.5979	109	1.48%	78	1.34325e-2	2.3084	16	29	0.37%
		enhancer binding	24	6.10030e-18	9.37412e-16	2.5415	112	1.52%	70	7.62555e-3	2.2821	18	33	0.42%
		RNA polymerase II activating transcription factor binding	28	1.56495e-16	2.06126e-14	2.5195	104	1.41%	96	4.89876e-2	2.0322	17	35	0.39%
		core promoter proximal region DNA binding	36	4.59890e-13	4.71131e-11	2.0225	128	1.73%	39	1.50456e-3	2.1756	26	50	0.60%
		neurotransmitter transporter activity	54	2.44177e-9	1.66764e-7	2.9202	42	0.57%	80	1.45027e-2	2.4406	14	24	0.32%
		GABA receptor activity	87	4.81207e-7	2.03987e-5	2.1842	51	0.69%	95	4.25726e-2	2.3908	12	21	0.28%
		GABA-A receptor activity	91	6.01285e-7	2.43686e-5	2.2492	47	0.64%	89	3.41629e-2	2.5568	11	18	0.26%
	GO Biological Process	pattern specification process	1	1.11544e-113	1.16452e-109	2.1536	1013	13.71%	21	6.39176e-30	2.1018	213	424	4.94%
		regionalization	2	2.83280e-107	1.47872e-103	2.3956	779	10.54%	31	1.53337e-26	2.2454	161	300	3.73%
		embryonic organ morphogenesis	3	1.36775e-100	4.75978e-97	2.4033	728	9.85%	51	4.97890e-22	2.2021	140	266	3.25%
		embryonic organ development	4	2.40932e-90	6.28833e-87	2.0634	895	12.11%	35	3.12413e-25	2.0493	192	392	4.45%
		spinal cord development	7	8.12717e-83	1.21211e-79	3.2953	365	4.94%	118	9.74293e-15	2.7893	56	84	1.30%
		cell differentiation in spinal cord	8	2.93365e-81	3.82841e-78	4.0529	277	3.75%	178	5.24278e-11	3.0124	36	50	0.83%
		neuron fate commitment	10	1.57546e-73	1.64478e-70	3.4651	303	4.10%	89	8.90680e-18	3.3066	49	62	1.14%
		anterior/posterior pattern specification	11	2.25473e-72	2.13995e-69	2.4948	493	6.67%	92	1.68628e-17	2.2529	105	195	2.44%
		central nervous system neuron differentiation	15	1.89178e-63	1.31668e-60	2.2319	537	7.27%	45	8.73632e-23	2.6284	98	156	2.27%
		cell fate commitment	16	7.88686e-63	5.14618e-60	2.0902	613	8.30%	29	1.64940e-27	2.4842	133	224	3.08%
		cardiac chamber formation	23	1.79858e-58	8.16400e-56	5.9241	136	1.84%	511	4.99413e-4	3.4866	10	12	0.23%
		cell fate specification	25	6.13942e-57	2.56382e-54	3.0077	285	3.86%	109	2.40448e-15	3.0897	48	65	1.11%
		neuron fate specification	27	3.03788e-56	1.17465e-53	4.0456	191	2.58%	203	1.92304e-9	3.4625	24	29	0.56%
		dorsal spinal cord development	32	1.71746e-54	5.60322e-52	5.7420	130	1.76%	240	4.66453e-8	3.6134	19	22	0.44%
		cardiac ventricle formation	35	2.85616e-54	8.51952e-52	5.9222	126	1.71%	597	1.50110e-3	3.4232	9	11	0.21%
		cell migration involved in heart development	45	5.11330e-47	1.18629e-44	8.0895	85	1.15%	830	1.25952e-2	3.2541	7	9	0.16%
		ventral spinal cord development	57	3.95715e-43	7.24784e-41	3.0411	211	2.86%	226	1.40111e-8	2.9593	29	41	0.67%
	GO Cellular Component	N-methyl-D-aspartate selective glutamate receptor complex	22	1.56538e-7	9.00096e-6	2.6468	38	0.51%	54	2.34574e-2	3.2541	7	9	0.16%
	Disease Ontology	aniridia	6	6.23210e-18	2.32146e-15	6.7488	35	0.47%	184	3.95979e-2	4.1839	4	4	0.09%
		iris disease	8	4.00971e-16	1.12021e-13	3.9643	52	0.70%	190	4.47773e-2	2.3244	10	18	0.23%
		Hirschsprung's disease	11	8.96636e-15	1.82180e-12	3.0131	68	0.92%	118	7.74493e-3	2.7072	11	17	0.26%
		megacolon	16	1.11762e-13	1.56117e-11	2.8503	68	0.92%	164	2.09361e-2	2.4223	11	19	0.26%
		Lewy body disease	39	7.66862e-11	4.39471e-9	2.3946	71	0.96%	96	2.81639e-3	2.2021	20	38	0.46%
		ocular motility disease	44	1.81661e-10	9.22756e-9	2.2166	80	1.08%	99	4.35210e-3	2.1456	20	39	0.46%
		cervical adenocarcinoma	51	1.13930e-9	4.99281e-8	2.6620	51	0.69%	190	4.47773e-2	2.3244	10	18	0.23%
		sex cord-gonadal stromal tumor	70	1.27374e-7	4.06688e-6	2.8538	34	0.46%	187	3.94151e-2	3.1379	6	8	0.14%
		cocaine dependence	73	1.48349e-7	4.54191e-6	2.7379	36	0.49%	154	1.63381e-2	2.6149	10	16	0.23%
		aveolar rhabdomyosarcoma	77	2.41719e-7	7.01612e-6	2.9382	31	0.42%	176	3.36078e-2	2.9287	7	10	0.16%
		diabetic macular edema	94	1.02574e-6	2.43885e-5	9.0989	9	0.12%	184	3.95979e-2	4.1839	4	4	0.09%
		synostosis	95	1.10967e-6	2.61065e-5	2.0393	56	0.76%	182	3.68717e-2	2.5103	9	15	0.21%
		insulinoma	129	9.11191e-6	1.57869e-4	2.1917	39	0.53%	190	4.47773e-2	2.3244	10	18	0.23%
		osteochondritis dissecans	146	1.70131e-5	2.60440e-4	2.1067	40	0.54%	173	2.77738e-2	2.4611	10	17	0.23%
		plasma protein metabolism disease	155	2.86103e-5	4.12542e-4	2.7770	22	0.30%	195	4.78923e-2	2.5747	8	13	0.19%
		macroglobulinemia	193	1.54921e-4	1.79404e-3	2.6741	19	0.26%	146	1.53288e-2	3.2541	7	9	0.16%
		pleural tuberculosis	199	1.79412e-4	2.01501e-3	3.2166	14	0.19%	176	3.36078e-2	2.9287	7	10	0.16%
	MSigDB Pathway	Maturity onset diabetes of the young	1	1.52322e-21	2.01065e-18	3.2548	92	1.25%	12	2.56400e-3	2.6777	16	25	0.37%
		Genes involved in Regulation of beta-cell development	6	8.52823e-18	1.87621e-15	2.6356	104	1.41%	8	8.15049e-4	2.6498	19	30	0.44%
		Genes involved in Amine compound SLC transporters	19	1.08020e-9	7.50458e-8	2.5555	55	0.74%	43	4.70552e-2	2.1694	14	27	0.32%
		Genes involved in GABA A receptor activation	20	1.22404e-9	8.07864e-8	2.7188	49	0.66%	13	2.48205e-3	3.4866	10	12	0.23%
		Genes involved in Ligand-gated ion channel transport	25	1.46074e-8	7.71270e-7	2.3223	57	0.77%	35	4.13589e-2	2.3908	12	21	0.28%
		Genes involved in Class C/3 (Metabotropic glutamate/pheromone receptors)	34	3.22222e-7	1.25098e-5	2.3774	44	0.60%	42	4.78775e-2	2.6897	9	14	0.21%
5	GO Molecular Function	histamine receptor activity	140	1.36181e-3	3.58739e-2	2.8586	12	0.20%	64	2.26734e-2	3.0640	7	7	0.12%
	GO Biological Process	epithelial-mesenchymal cell signaling	46	4.32022e-10	9.80503e-8	3.7081	33	0.54%	603	6.81224e-3	3.0640	7	7	0.12%
		positive regulation of oligodendrocyte differentiation	47	4.82201e-10	1.07110e-7	3.2531	39	0.63%	580	5.32113e-3	2.7576	9	10	0.15%
		positive regulation of cerebellar granule cell precursor proliferation	56	4.11069e-9	7.66351e-7	3.4555	32	0.52%	692	1.23726e-2	2.7236	8	9	0.14%
		collecting duct development	60	4.77425e-9	8.30720e-7	3.2834	34	0.55%	721	1.66634e-2	2.5069	9	11	0.15%
		positive regulation of glial cell differentiation	80	2.39799e-8	3.12938e-6	2.1533	65	1.06%	318	1.24455e-4	2.4257	19	24	0.32%
		regulation of cerebellar granule cell precursor proliferation	86	3.52883e-8	4.28383e-6	3.0173	34	0.55%	859	3.96696e-2	2.2980	9	12	0.15%
		negative regulation of epithelial cell differentiation	133	5.95863e-7	4.67730e-5	2.0974	55	0.90%	666	1.02729e-2	2.0427	16	24	0.27%
		positive regulation of mRNA catabolic process	151	1.23939e-6	8.56900e-5	2.8871	28	0.46%	876	4.02539e-2	2.1886	10	14	0.17%
		lung lobe morphogenesis	270	2.40055e-5	9.28214e-4	2.4495	28	0.46%	603	6.81224e-3	3.0640	7	7	0.12%
		protein targeting to plasma membrane	273	2.47728e-5	9.47356e-4	2.4450	28	0.46%	773	2.04676e-2	2.1628	12	17	0.20%
		ventral spinal cord interneuron differentiation	279	2.61601e-5	9.78893e-4	2.1098	38	0.62%	754	1.89024e-2	2.3569	10	13	0.17%
		negative regulation of Notch signaling pathway	285	2.75480e-5	1.00913e-3	2.4300	28	0.46%	768	2.03503e-2	2.0964	13	19	0.22%
		endocytic recycling	288	2.89549e-5	1.04961e-3	2.9457	20	0.33%	558	4.23084e-3	2.4512	12	15	0.20%
		positive regulation of dendritic spine development	301	3.76141e-5	1.30462e-3	2.4797	26	0.42%	645	9.06731e-3	2.4075	11	14	0.19%
		cardiac muscle cell proliferation	340	6.02706e-5	1.85066e-3	2.1791	32	0.52%	645	9.06731e-3	2.4075	11	14	0.19%
		striated muscle cell proliferation	345	6.39880e-5	1.93633e-3	2.1719	32	0.52%	764	2.02085e-2	2.2470	11	15	0.19%
		regulation of potassium ion transmembrane transport	373	8.35325e-5	2.33801e-3	2.0140	37	0.60%	768	2.03503e-2	2.0964	13	19	0.22%
		foregut morphogenesis	477	2.13985e-4	4.68345e-3	2.0824	30	0.49%	859	3.96696e-2	2.2980	9	12	0.15%
	GO Cellular Component	PRC1 complex	7	1.82581e-12	3.29950e-10	7.7404	21	0.34%	28	6.54842e-5	3.0640	12	12	0.20%
	Disease Ontology	angiosarcoma	37	1.02625e-7	6.19909e-6	3.4688	26	0.42%	168	1.09102e-2	2.7236	8	9	0.14%
		interstitial nephritis	142	2.93019e-4	4.61196e-3	2.7052	17	0.28%	227	3.21368e-2	2.2980	9	12	0.15%
		syndactyly	231	1.95086e-3	1.88752e-2	2.0226	22	0.36%	179	1.50634e-2	3.0640	6	6	0.10%
	MSigDB Pathway	Map Kinase Inactivation of SMRT Corepressor	68	7.59851e-4	1.47500e-2	2.1017	24	0.39%	24	5.80686e-3	2.7855	10	11	0.17%
7	GO Molecular Function	Wnt-activated receptor activity	5	1.17896e-13	8.69600e-11	4.0519	42	1.04%	61	2.15601e-2	2.8895	11	20	0.32%
		Wnt-protein binding	7	2.72863e-12	1.43760e-9	3.1727	51	1.26%	41	4.08009e-3	2.8144	15	28	0.44%
		gap junction channel activity	26	1.97754e-6	2.80506e-4	4.0684	17	0.42%	56	1.68665e-2	3.3773	9	14	0.26%
		E-box binding	30	4.57002e-6	5.61808e-4	2.2862	38	0.94%	35	1.62338e-3	2.8986	16	29	0.47%
	GO Biological Process	dorsal spinal cord development	2	4.92645e-14	2.57161e-10	3.7818	47	1.16%	488	4.54498e-3	2.8656	12	22	0.35%
		spinal cord association neuron differentiation	8	7.12664e-11	9.30026e-8	3.9839	33	0.81%	785	4.05842e-2	2.8019	8	15	0.23%
		positive regulation of protein sumoylation	24	1.58239e-8	6.88339e-6	5.1203	19	0.47%	583	1.12389e-2	3.6775	7	10	0.20%
		insulin secretion	41	8.45771e-8	2.15362e-5	2.4962	44	1.08%	477	4.15372e-3	2.4723	16	34	0.47%
		hormone secretion	59	1.81952e-7	3.21963e-5	2.0168	66	1.63%	443	2.67691e-3	2.0848	25	63	0.73%
		peptide hormone secretion	61	2.04776e-7	3.50469e-5	2.2263	52	1.28%	553	8.93426e-3	2.1015	20	50	0.58%
		positive regulation of branching involved in ureteric bud morphogenesis	66	3.36588e-7	5.32421e-5	2.7294	34	0.84%	650	1.68783e-2	2.7651	10	19	0.29%
		peptide secretion	78	6.39546e-7	8.56007e-5	2.1409	52	1.28%	614	1.45703e-2	2.0206	20	52	0.58%
		renal sodium ion absorption	88	8.93391e-7	1.05989e-4	6.2471	12	0.30%	669	2.04559e-2	5.2536	4	4	0.12%
		thyroid gland development	89	9.28531e-7	1.08920e-4	3.2532	24	0.59%	360	8.49797e-4	3.3181	12	19	0.35%
		regulation of dopamine uptake involved in synaptic transmission	93	1.07988e-6	1.21225e-4	4.0468	18	0.44%	813	4.76559e-2	3.7526	5	7	0.15%
		enteric nervous system development	111	2.46848e-6	2.32170e-4	2.4508	35	0.86%	530	7.02449e-3	2.8895	11	20	0.32%
		neuron fate specification	122	3.90758e-6	3.34386e-4	2.0065	52	1.28%	224	1.91042e-5	3.2609	18	29	0.52%
		regulation of branching involved in ureteric bud morphogenesis	130	5.24139e-6	4.20924e-4	2.3652	35	0.86%	642	1.67234e-2	2.6268	11	22	0.32%
		cranial nerve structural organization	138	7.07373e-6	5.35143e-4	3.6865	17	0.42%	813	4.76559e-2	3.7526	5	7	0.15%
		nucleobase catabolic process	144	9.80500e-6	7.10863e-4	3.0768	21	0.52%	737	3.31543e-2	3.5024	6	9	0.17%
		pyrimidine nucleobase catabolic process	149	1.15113e-5	8.06567e-4	3.3954	18	0.44%	813	4.76559e-2	3.7526	5	7	0.15%
		pyrimidine nucleobase metabolic process	152	1.21721e-5	8.36032e-4	2.2706	35	0.86%	763	3.78842e-2	2.2031	13	31	0.38%
		metanephric nephron tubule formation	161	1.50989e-5	9.79085e-4	3.8380	15	0.37%	669	2.04559e-2	5.2536	4	4	0.12%
	GO Cellular Component	connexon complex	7	2.80946e-5	5.07710e-3	3.1687	18	0.44%	50	1.56966e-2	2.7519	11	21	0.32%
	Disease Ontology	sensorineural hearing loss	2	1.21855e-9	1.36173e-6	2.8998	44	1.08%	68	4.53938e-4	2.4592	22	47	0.64%
		fibrous tissue neoplasm	10	1.19984e-6	2.68163e-4	2.1484	49	1.21%	130	2.08505e-2	2.0558	18	46	0.52%
		islet cell tumor	37	1.00551e-4	6.07381e-3	2.4253	24	0.59%	91	4.75910e-3	3.0416	11	19	0.32%
		insulinoma	47	2.09516e-4	9.96316e-3	2.3547	23	0.57%	107	1.25276e-2	2.9187	10	18	0.29%
		strabismus	55	4.08107e-4	1.65840e-2	2.6248	17	0.42%	156	3.35320e-2	3.5024	6	9	0.17%
		tetralogy of Fallot	92	1.96657e-3	4.77747e-2	2.1024	20	0.49%	165	4.13351e-2	2.8019	8	15	0.23%
	MSigDB Cancer Neighborhood	Neighborhood of RAB3A	1	2.65414e-8	1.13332e-5	2.2768	57	1.41%	3	2.46783e-2	2.4138	17	37	0.50%
	MSigDB Pathway	Wnt signaling network	1	5.94635e-10	7.84918e-7	2.8485	47	1.16%	6	9.97897e-3	2.8144	15	28	0.44%
		Genes involved in Gap junction assembly	6	1.42518e-5	3.13540e-3	3.3402	18	0.44%	12	1.08408e-2	3.2106	11	18	0.32%
8	GO Biological Process	lens fiber cell development	17	5.20869e-13	3.19875e-10	3.5392	47	0.63%	349	2.75710e-3	2.5788	11	12	0.17%
		positive regulation of hormone metabolic process	92	1.53088e-9	1.73722e-7	3.1191	39	0.53%	519	1.95582e-2	2.3443	10	12	0.16%
		pharyngeal system development	241	5.61246e-7	2.43129e-5	2.2119	49	0.66%	420	6.04177e-3	2.2857	13	16	0.20%
		L-glutamate import	293	2.60260e-6	9.27344e-5	3.6350	19	0.26%	491	1.52162e-2	2.8132	7	7	0.11%
		interkinetic nuclear migration	354	1.08667e-5	3.20475e-4	3.5658	17	0.23%	491	1.52162e-2	2.8132	7	7	0.11%
		response to iron ion	619	3.24659e-4	5.47567e-3	2.0301	30	0.40%	583	3.01999e-2	2.0318	13	18	0.20%
9	GO Biological Process	regulation of T-helper 2 cell differentiation	166	1.91180e-15	1.20236e-13	3.8129	52	0.40%	975	1.27365e-2	2.1128	9	9	0.11%
		ventral spinal cord interneuron specification	314	1.83435e-11	6.09892e-10	2.4435	73	0.56%	861	6.82269e-3	2.1128	10	10	0.12%
	GO Cellular Component	uropod	75	3.46115e-7	5.83781e-6	3.0171	29	0.22%	94	3.38364e-2	2.1128	8	8	0.09%
	Disease Ontology	mediastinum cancer	81	4.53867e-14	1.25234e-12	3.6757	49	0.38%	261	2.15307e-2	2.1128	8	8	0.09%
		arteriovenous malformation	105	9.75711e-13	2.07687e-11	4.4592	35	0.27%	291	4.08175e-2	2.1128	7	7	0.08%
10	GO Molecular Function	ankyrin binding	144	8.46704e-4	2.16850e-2	2.1228	23	0.43%	20	1.31348e-2	2.5408	14	19	0.27%
	GO Biological Process	lipid digestion	46	4.90792e-9	1.11388e-6	6.7653	16	0.30%	183	2.47941e-2	2.8213	9	11	0.17%
		copulation	238	5.13610e-5	2.25298e-3	2.4315	26	0.49%	188	2.56648e-2	2.4340	12	17	0.23%
		insemination	241	5.94705e-5	2.57623e-3	2.6386	22	0.41%	192	2.60896e-2	2.6525	10	13	0.19%
		regulation of fatty acid biosynthetic process	276	1.37686e-4	5.20813e-3	2.1080	31	0.58%	91	5.60899e-3	2.2592	19	29	0.36%
		negative regulation of lipoprotein particle clearance	511	2.01549e-3	4.11775e-2	3.6234	8	0.15%	131	1.37101e-2	3.4482	7	7	0.13%
11	GO Molecular Function	cytoskeletal adaptor activity	109	3.01542e-4	1.02026e-2	2.2483	24	0.40%	17	3.38140e-3	2.6906	14	17	0.25%
		1-acylglycerol-3-phosphate O-acyltransferase activity	155	1.81136e-3	4.30988e-2	2.1186	20	0.33%	29	2.16367e-2	2.9404	9	10	0.16%
	GO Biological Process	intermediate filament organization	83	5.25774e-8	6.61335e-6	3.0244	33	0.55%	556	3.51512e-2	2.2461	11	16	0.20%
		metanephric nephron morphogenesis	97	1.27500e-7	1.37227e-5	2.1548	58	0.97%	248	9.24710e-4	2.4892	16	21	0.29%
		sarcomere organization	107	2.65721e-7	2.59264e-5	2.5884	38	0.63%	219	4.78845e-4	2.3875	19	26	0.34%
		metanephric renal vesicle morphogenesis	124	1.08248e-6	9.11382e-5	2.3462	41	0.68%	172	1.33156e-4	3.2671	11	11	0.20%
		renal vesicle morphogenesis	159	3.25515e-6	2.13735e-4	2.2405	41	0.68%	242	8.17479e-4	2.9949	11	12	0.20%
		mesenchymal to epithelial transition involved in metanephros morphogenesis	179	6.22774e-6	3.63227e-4	2.3818	34	0.57%	253	9.68582e-4	3.2671	9	9	0.16%
		renal vesicle development	192	8.28336e-6	4.50408e-4	2.0876	44	0.73%	197	3.31635e-4	3.0158	12	13	0.22%
		positive regulation of steroid biosynthetic process	262	5.43225e-5	2.16461e-3	2.6557	22	0.37%	564	3.65620e-2	2.4503	9	12	0.16%
		cardiac muscle hypertrophy in response to stress	284	7.26501e-5	2.67066e-3	2.3348	27	0.45%	242	8.17479e-4	2.9949	11	12	0.20%
		pattern specification involved in kidney development	350	2.05629e-4	6.13363e-3	2.0324	32	0.53%	433	1.21301e-2	2.9041	8	9	0.14%
		cerebellar granular layer morphogenesis	539	1.86972e-3	3.62151e-2	2.1609	19	0.32%	521	2.94723e-2	2.8587	7	8	0.13%
		negative regulation of protein homooligomerization	558	2.24967e-3	4.20906e-2	2.4631	14	0.23%	476	1.80007e-2	3.2671	6	6	0.11%
	Disease Ontology	hemangioblastoma	84	3.16200e-4	8.41319e-3	2.1603	26	0.43%	79	2.28904e-2	2.3959	11	15	0.20%
12	GO Molecular Function	extracellular matrix structural constituent	1	2.45392e-25	9.05006e-22	3.6248	94	3.25%	10	1.74464e-3	2.1500	33	82	0.98%
	GO Biological Process	protein targeting to plasma membrane	15	5.08687e-12	3.54046e-9	5.1971	28	0.97%	535	3.08006e-2	2.8283	9	17	0.27%
		cellular response to electrical stimulus	80	7.46506e-7	9.74191e-5	5.7789	13	0.45%	345	6.11027e-3	4.1551	7	9	0.21%
		hindgut morphogenesis	95	2.26813e-6	2.49256e-4	3.1752	23	0.80%	265	2.11204e-3	4.6745	7	8	0.21%
		excretion	111	5.10690e-6	4.80325e-4	2.4009	34	1.18%	260	2.03707e-3	2.3045	22	51	0.65%
		negative regulation of cysteine-type endopeptidase activity	117	8.35180e-6	7.45238e-4	2.0827	44	1.52%	333	5.36044e-3	2.0130	26	69	0.77%
		negative regulation of lipid metabolic process	123	1.01769e-5	8.63792e-4	2.1761	39	1.35%	370	8.38642e-3	2.0479	23	60	0.68%
		negative regulation of cysteine-type endopeptidase activity involved in apoptotic process	133	1.60058e-5	1.25640e-3	2.0651	42	1.45%	348	6.17230e-3	2.0236	25	66	0.74%
		extracellular matrix disassembly	137	1.80354e-5	1.37438e-3	2.0345	43	1.49%	284	2.74455e-3	2.0120	29	77	0.86%
		ventral spinal cord interneuron differentiation	150	2.64236e-5	1.83909e-3	2.7144	23	0.80%	207	4.31668e-4	4.1095	10	13	0.30%
		negative regulation of insulin secretion	196	7.27328e-5	3.87413e-3	2.3316	27	0.93%	338	5.50068e-3	2.6712	14	28	0.41%
		neural tube patterning	220	1.13595e-4	5.39062e-3	2.1290	31	1.07%	395	1.04972e-2	2.4283	15	33	0.44%
		negative regulation of peptide hormone secretion	239	1.70731e-4	7.45789e-3	2.1731	28	0.97%	361	7.56676e-3	2.5042	15	32	0.44%
		negative regulation of peptide secretion	248	1.90899e-4	8.03621e-3	2.1579	28	0.97%	395	1.04972e-2	2.4283	15	33	0.44%
		surfactant homeostasis	262	2.29194e-4	9.13276e-3	3.3073	13	0.45%	567	3.93501e-2	3.5615	6	9	0.18%
		spinal cord dorsal/ventral patterning	271	2.50179e-4	9.63789e-3	2.3233	23	0.80%	466	2.05293e-2	2.8117	10	19	0.30%
		positive regulation of mRNA catabolic process	279	2.84251e-4	1.06365e-2	3.0684	14	0.48%	351	6.66312e-3	3.4343	9	14	0.27%
		regulation of nuclear-transcribed mRNA catabolic process, deadenylation-dependent decay	288	3.10719e-4	1.12636e-2	3.2018	13	0.45%	321	4.66604e-3	3.8853	8	11	0.24%
	GO Cellular Component	Golgi lumen	9	9.53489e-10	1.34018e-7	2.3785	63	2.18%	16	2.68186e-4	2.1248	35	88	1.04%
		node of Ranvier	26	1.07077e-6	5.20968e-5	3.7028	20	0.69%	44	4.38044e-2	3.0528	8	14	0.24%
		photoreceptor disc membrane	38	1.08292e-5	3.60500e-4	4.8679	12	0.42%	29	9.77185e-3	3.4343	9	14	0.27%
		anchoring collagen	87	2.55680e-3	3.71765e-2	2.6432	12	0.42%	37	1.92723e-2	3.7396	7	10	0.21%
	Disease Ontology	appendicitis	82	1.69736e-3	4.62634e-2	3.7251	8	0.28%	76	7.40944e-3	4.5791	6	7	0.18%
	PANTHER Pathway	Adrenaline and noradrenaline biosynthesis	2	1.13865e-6	8.65373e-5	3.5475	21	0.73%	6	4.84228e-2	2.3744	12	27	0.36%
	MSigDB Pathway	Genes involved in NCAM1 interactions	4	5.87915e-9	1.94012e-6	2.7814	43	1.49%	2	3.01831e-3	2.7396	20	39	0.59%
		Genes involved in NCAM signaling for neurite out-growth	6	5.26589e-8	1.15850e-5	2.3483	51	1.76%	5	3.20552e-3	2.2538	27	64	0.80%
		Genes involved in Termination of O-glycan biosynthesis	8	3.28356e-7	5.41787e-5	3.8404	21	0.73%	21	3.35666e-2	2.7984	11	21	0.33%
		Genes involved in Regulation of Insulin Secretion by Glucagon-like Peptide-1	16	1.58461e-5	1.30731e-3	2.4587	29	1.00%	9	2.80235e-3	2.5440	20	42	0.59%
		Actions of Nitric Oxide in the Heart	32	4.32776e-4	1.78520e-2	2.1883	24	0.83%	10	2.88413e-3	2.8492	16	30	0.47%
		FOXA2 and FOXA3 transcription factor networks	35	6.71760e-4	2.53350e-2	2.0821	25	0.86%	25	3.84942e-2	2.1369	18	45	0.53%
13	GO Molecular Function	ionotropic glutamate receptor binding	21	4.07835e-7	7.16236e-5	4.1258	19	0.80%	22	2.11709e-2	4.4381	8	15	0.37%
	GO Biological Process	hypothalamus development	40	1.59862e-8	4.17240e-6	3.4048	30	1.26%	264	2.32838e-2	3.4042	9	22	0.42%
		hypothalamus cell differentiation	46	3.05780e-7	6.93987e-5	5.7407	14	0.59%	288	3.69825e-2	5.2009	5	8	0.23%
		embryonic hindlimb morphogenesis	70	9.19787e-6	1.37180e-3	2.2981	35	1.48%	140	2.08084e-4	3.8834	14	30	0.65%
		neuron fate specification	109	2.22558e-4	2.13165e-2	2.0454	31	1.31%	129	1.35414e-4	4.0173	14	29	0.65%
		intestinal epithelial cell differentiation	116	2.90053e-4	2.61047e-2	3.9716	10	0.42%	309	4.89584e-2	4.1607	6	12	0.28%
15	GO Molecular Function	HMG box domain binding	12	2.76881e-11	8.50947e-9	4.5018	30	1.46%	30	3.85657e-2	3.5937	9	19	0.38%
	GO Biological Process	anterior/posterior pattern specification	1	6.14925e-44	6.41982e-40	3.3314	183	8.91%	15	3.57277e-13	2.7234	70	195	2.94%
		thyroid gland development	3	3.87770e-36	1.34944e-32	12.8481	48	2.34%	304	1.07735e-2	3.5937	9	19	0.38%
		regionalization	4	7.93471e-32	2.07096e-28	2.4117	218	10.61%	19	7.95247e-13	2.3266	92	300	3.87%
		embryonic organ morphogenesis	5	1.04668e-31	2.18546e-28	2.4702	208	10.13%	8	4.43314e-14	2.5099	88	266	3.70%
		rhombomere development	6	9.44401e-30	1.64326e-26	16.8070	34	1.66%	411	3.98540e-2	4.7416	5	8	0.21%
		embryonic organ development	8	1.51100e-25	1.97186e-22	2.0403	246	11.98%	21	1.31624e-12	2.1289	110	392	4.63%
		glossopharyngeal nerve development	9	3.38015e-25	3.92098e-22	16.2430	29	1.41%	400	3.51677e-2	6.0693	4	5	0.17%
		embryonic skeletal system morphogenesis	11	1.89389e-24	1.79748e-21	3.4450	96	4.67%	70	1.35597e-8	3.1036	36	88	1.51%
		embryonic skeletal system development	14	1.03672e-21	7.73094e-19	2.8012	114	5.55%	54	2.44716e-10	2.9828	46	117	1.93%
		skeletal system morphogenesis	23	2.71028e-18	1.23023e-15	2.3094	134	6.52%	74	1.79243e-8	2.3435	59	191	2.48%
		mammary gland alveolus development	48	6.18861e-15	1.34602e-12	4.8731	38	1.85%	304	1.07735e-2	3.5937	9	19	0.38%
		endocrine system development	69	1.38089e-12	2.08935e-10	2.1564	103	5.01%	124	6.91483e-6	2.3708	40	128	1.68%
		negative regulation of myeloid cell differentiation	70	1.46340e-12	2.18256e-10	3.0894	54	2.63%	314	1.13028e-2	2.1398	22	78	0.93%
		spleen development	86	2.18053e-11	2.64706e-9	3.6922	38	1.85%	286	8.44491e-3	3.0347	12	30	0.50%
		hindbrain development	93	4.05716e-11	4.55449e-9	2.1849	87	4.24%	130	1.51575e-5	2.3630	38	122	1.60%
		mammary gland epithelium development	102	1.74161e-10	1.78259e-8	2.5021	62	3.02%	350	1.89480e-2	2.2387	18	61	0.76%
		trachea development	117	6.13816e-10	5.47712e-8	4.3265	27	1.31%	341	1.73816e-2	4.0851	7	13	0.29%
		digestive tract development	134	3.57329e-9	2.78397e-7	2.0050	85	4.14%	104	1.26259e-6	2.5507	39	116	1.64%
		head development	140	6.41365e-9	4.78275e-7	2.6587	46	2.24%	131	1.59151e-5	3.2097	22	52	0.93%
		bundle of His development	145	1.23144e-8	8.86639e-7	6.8441	15	0.73%	296	1.06234e-2	7.5866	4	4	0.17%
	Disease Ontology	coronary restenosis	4	5.41706e-8	3.02678e-5	16.2692	8	0.39%	86	3.50173e-2	6.0693	4	5	0.17%
		hemangioma of skin	116	2.52994e-3	4.87450e-2	2.7887	11	0.54%	96	3.94089e-2	2.9687	9	23	0.38%
	PANTHER Pathway	PI3 kinase pathway	1	1.32960e-5	2.02099e-3	2.5792	27	1.31%	1	4.18250e-2	2.5289	16	48	0.67%
16	GO Biological Process	rhombomere 4 development	34	3.95632e-12	1.21482e-9	39.1386	9	0.48%	357	4.24121e-2	8.8306	3	3	0.15%
		rhombomere development	52	1.34878e-9	2.70793e-7	8.0968	15	0.80%	294	2.74310e-2	5.5192	5	8	0.24%
		parasympathetic nervous system development	75	2.86502e-8	3.98810e-6	4.6711	20	1.06%	281	2.47515e-2	4.1210	7	15	0.34%
		negative regulation of glial cell differentiation	80	4.27316e-8	5.57647e-6	3.3298	29	1.54%	238	1.65268e-2	3.6125	9	22	0.44%
		cell differentiation in spinal cord	82	5.35930e-8	6.82331e-6	2.5290	44	2.34%	126	1.60524e-3	3.0024	17	50	0.83%
		spinal cord motor neuron differentiation	90	1.12307e-7	1.30276e-5	2.7584	36	1.91%	182	6.32404e-3	3.3115	12	32	0.59%
		embryonic hemopoiesis	99	1.93165e-7	2.03701e-5	3.2524	27	1.44%	330	3.57144e-2	3.1790	9	25	0.44%
		embryonic skeletal system morphogenesis	103	2.23472e-7	2.26509e-5	2.1552	55	2.92%	27	5.77672e-8	3.3115	33	88	1.62%
		regulation of fat cell differentiation	105	2.29984e-7	2.28670e-5	2.3179	47	2.50%	304	3.04247e-2	2.2077	18	72	0.88%
		negative regulation of gliogenesis	111	3.12122e-7	2.93563e-5	2.8339	32	1.70%	202	9.77158e-3	3.3496	11	29	0.54%
		mammary gland epithelium development	118	4.16647e-7	3.68627e-5	2.2034	50	2.66%	175	5.63425e-3	2.6058	18	61	0.88%
		regulation of cell fate commitment	138	1.57553e-6	1.19192e-4	2.9077	27	1.44%	132	1.81190e-3	3.7846	12	28	0.59%
		autonomic nervous system development	154	4.14169e-6	2.80775e-4	2.1846	42	2.23%	97	3.39078e-4	3.2439	18	49	0.88%
		regulation of glial cell differentiation	155	4.23932e-6	2.85539e-4	2.2321	40	2.13%	100	3.94376e-4	3.3360	17	45	0.83%
		ventricular septum development	163	6.38077e-6	4.08682e-4	2.1925	40	2.13%	200	9.20741e-3	2.8751	14	43	0.69%
		negative regulation of JNK cascade	165	6.85730e-6	4.33880e-4	3.6895	17	0.90%	349	4.16712e-2	3.3641	8	21	0.39%
		neural nucleus development	172	8.14015e-6	4.94088e-4	3.2186	20	1.06%	141	2.31293e-3	4.6750	9	17	0.44%
		ventral spinal cord development	210	3.56692e-5	1.77327e-3	2.0948	37	1.97%	246	1.69889e-2	2.8000	13	41	0.64%
		thymus development	226	5.84364e-5	2.69945e-3	2.2080	31	1.65%	155	3.53901e-3	3.1700	14	39	0.69%
		response to UV-B	231	6.46570e-5	2.92216e-3	4.3672	11	0.58%	321	3.47693e-2	3.8634	7	16	0.34%
	Disease Ontology	pituitary disease	15	1.62535e-9	2.42178e-7	3.7721	30	1.59%	83	2.39627e-2	3.0450	10	29	0.49%
		hypothalamic disease	20	8.94561e-9	9.99672e-7	3.4929	30	1.59%	123	3.79256e-2	2.7596	10	32	0.49%
		purpura	47	5.92532e-5	2.81768e-3	2.3581	27	1.44%	108	2.99712e-2	2.1757	17	69	0.83%
		polyneuropathy	73	2.23106e-4	6.83072e-3	2.5906	19	1.01%	49	8.00893e-3	2.7596	15	48	0.73%
		adult respiratory distress syndrome	112	1.96963e-3	3.93046e-2	2.6027	13	0.69%	63	1.32480e-2	3.1335	11	31	0.54%
		hepatitis E	116	2.14354e-3	4.13000e-2	4.6483	6	0.32%	39	5.77519e-3	7.3589	5	6	0.24%
17	GO Biological Process	positive regulation of histone deacetylation	355	1.80210e-8	5.29971e-7	3.4844	29	0.33%	855	4.38270e-2	2.2388	8	9	0.11%
		renal interstitial cell differentiation	478	3.86206e-7	8.43512e-6	2.9995	29	0.33%	735	2.20539e-2	2.5186	7	7	0.10%
		renal interstitial cell development	491	4.95267e-7	1.05307e-5	3.1885	26	0.29%	882	4.63116e-2	2.5186	6	6	0.08%
		coronary vasculature development	511	6.32031e-7	1.29127e-5	2.4969	38	0.43%	708	1.79616e-2	2.1312	11	13	0.15%
		adenosine receptor signaling pathway	558	1.44907e-6	2.71117e-5	3.3774	22	0.25%	855	4.38270e-2	2.2388	8	9	0.11%
		mesangial cell differentiation	601	2.88793e-6	5.01664e-5	3.1334	23	0.26%	882	4.63116e-2	2.5186	6	6	0.08%
	GO Cellular Component	platelet dense tubular network membrane	69	2.14360e-8	3.92994e-7	3.7656	26	0.29%	60	5.15385e-3	2.5186	9	9	0.13%
		AP-2 adaptor complex	84	1.92136e-7	2.89347e-6	3.1824	28	0.32%	71	1.09770e-2	2.5186	8	8	0.11%
	Disease Ontology	capillary hemangioma	87	3.03376e-8	7.79362e-7	3.1666	32	0.36%	184	4.35981e-2	2.2388	8	9	0.11%
		intracranial aneurysm	117	3.97069e-7	7.58503e-6	2.7614	33	0.37%	140	1.37148e-2	2.0464	13	16	0.18%
	MSigDB Pathway	Genes involved in Signaling by NOTCH3	135	4.12577e-5	4.03409e-4	2.6388	23	0.26%	90	3.84769e-2	2.0989	10	12	0.14%
		IL 4 signaling pathway	159	8.01196e-5	6.65144e-4	2.9164	18	0.20%	53	1.69876e-2	2.2897	10	11	0.14%
		Genes involved in Signaling by NOTCH4	178	1.58068e-4	1.17219e-3	2.4610	22	0.25%	90	3.84769e-2	2.0989	10	12	0.14%
		Genes involved in Signaling by NOTCH2	218	5.12796e-4	3.10500e-3	2.2526	22	0.25%	90	3.84769e-2	2.0989	10	12	0.14%
		Genes involved in Receptor-ligand binding initiates the second proteolytic cleavage of Notch receptor	232	7.66732e-4	4.36244e-3	2.1828	22	0.25%	53	1.69876e-2	2.2897	10	11	0.14%
18	GO Biological Process	ubiquitin-dependent SMAD protein catabolic process	172	7.92136e-13	4.80808e-11	7.5979	22	0.26%	297	4.14651e-2	3.0755	6	6	0.10%
		labyrinthine layer blood vessel development	593	7.08111e-6	1.24666e-4	2.1919	40	0.48%	310	4.84809e-2	2.1043	13	19	0.22%
		mesonephric duct development	642	1.82184e-5	2.96261e-4	2.4016	30	0.36%	271	3.07075e-2	2.7338	8	9	0.14%
19	GO Molecular Function	14-3-3 protein binding	6	7.18124e-11	4.41407e-8	4.4737	29	0.73%	45	1.93503e-2	2.8030	11	16	0.25%
		ionotropic glutamate receptor binding	22	4.67577e-8	7.83828e-6	3.5074	27	0.68%	56	4.42182e-2	2.7180	10	15	0.23%
	GO Biological Process	glossopharyngeal nerve development	39	4.45962e-13	1.19381e-10	6.9636	24	0.61%	568	1.62883e-2	4.0771	5	5	0.11%
		thyroid gland development	58	1.86970e-10	3.36546e-8	4.1598	30	0.76%	477	8.70207e-3	2.5750	12	19	0.27%
		preganglionic parasympathetic nervous system development	61	4.36947e-10	7.47824e-8	4.1297	29	0.73%	560	1.57985e-2	2.8226	9	13	0.20%
		parasympathetic nervous system development	63	5.93877e-10	9.84139e-8	3.6564	33	0.83%	392	2.52752e-3	2.9898	11	15	0.25%
		positive regulation of glial cell differentiation	185	6.05145e-6	3.41498e-4	2.1564	42	1.06%	484	9.05460e-3	2.3783	14	24	0.32%
		positive regulation of gliogenesis	195	8.06758e-6	4.31926e-4	2.0497	46	1.16%	596	2.01674e-2	2.0385	17	34	0.38%
		cranial nerve morphogenesis	213	1.32191e-5	6.47922e-4	2.2613	35	0.88%	458	6.85451e-3	2.5239	13	21	0.29%
		platelet-derived growth factor receptor-beta signaling pathway	312	1.17352e-4	3.92678e-3	4.4568	10	0.25%	437	5.18828e-3	4.0771	6	6	0.14%
		regulation of interleukin-4 production	408	4.16053e-4	1.06461e-2	2.1958	24	0.61%	625	2.34062e-2	2.3298	12	21	0.27%
	GO Cellular Component	alpha-beta T cell receptor complex	53	4.28914e-5	1.02373e-3	9.8161	6	0.15%	43	2.60702e-2	4.0771	5	5	0.11%
	Disease Ontology	islet cell tumor	48	9.82850e-6	4.57640e-4	2.6877	26	0.66%	152	5.84621e-3	2.5750	12	19	0.27%
		insulinoma	63	2.19769e-5	7.79657e-4	2.6182	25	0.63%	172	1.35382e-2	2.4915	11	18	0.25%
		intrahepatic cholestasis	99	4.33803e-4	9.79344e-3	2.5280	18	0.45%	227	4.58636e-2	2.2650	10	18	0.23%
	MSigDB Pathway	Hypoxia and p53 in the Cardiovascular system	12	4.21781e-7	4.63959e-5	3.3046	25	0.63%	44	3.05391e-2	2.3044	13	23	0.29%
		Adipocytokine signaling pathway	13	5.47622e-7	5.56047e-5	2.0694	57	1.44%	5	8.40720e-4	2.0690	34	67	0.77%
		Phosphoinositides and their downstream targets.	15	8.49931e-7	7.47939e-5	3.0915	26	0.66%	44	3.05391e-2	2.3044	13	23	0.29%
		mTOR signaling pathway	20	1.34879e-6	8.90203e-5	2.2000	46	1.16%	17	7.29955e-3	2.0001	26	53	0.59%
		CTL mediated immune response against target cells	23	2.37591e-6	1.36356e-4	4.8114	14	0.35%	41	2.72831e-2	2.8226	9	13	0.20%
		PKC-catalyzed phosphorylation of inhibitory phosphoprotein of myosin phosphatase	27	4.25493e-6	2.08019e-4	2.4244	34	0.86%	14	6.49291e-3	2.3673	18	31	0.41%
		Noncanonical Wnt signaling pathway	73	2.13891e-4	3.86761e-3	2.0017	33	0.83%	56	3.77234e-2	2.0385	16	32	0.36%
		Genes involved in GPVI-mediated activation cascade	84	3.95468e-4	6.21450e-3	2.0310	29	0.73%	28	2.20223e-2	2.1659	17	32	0.38%
		CD40/CD40L signaling	92	4.99202e-4	7.16246e-3	2.0596	27	0.68%	9	5.49409e-3	2.4462	18	30	0.41%
		G alpha q Pathway	103	7.08821e-4	9.08393e-3	2.1947	22	0.55%	43	2.74946e-2	2.1841	15	28	0.34%
		Regulation of p38-alpha and p38-beta	107	8.48005e-4	1.04614e-2	2.0158	26	0.66%	48	2.84285e-2	2.1043	16	31	0.36%
		Map Kinase Inactivation of SMRT Corepressor	121	1.61646e-3	1.76341e-2	2.3072	17	0.43%	47	2.90032e-2	2.9651	8	11	0.18%
20	GO Biological Process	phosphatidylglycerol metabolic process	17	1.43633e-12	8.82077e-10	4.6379	33	0.87%	421	2.06658e-2	2.1705	16	33	0.40%
		regulation of myeloid dendritic cell activation	33	7.85098e-10	2.48376e-7	17.0188	10	0.26%	531	4.88969e-2	4.4767	4	4	0.10%
		antigen processing and presentation of exogenous peptide antigen via MHC class I, TAP-independent	163	1.27715e-5	8.18003e-4	6.6270	9	0.24%	517	4.58681e-2	3.3575	6	8	0.15%
		response to salt stress	202	6.84856e-5	3.53955e-3	2.8507	19	0.50%	436	2.40354e-2	2.4418	12	22	0.30%
		regulation of transcription from RNA polymerase II promoter involved in myocardial precursor cell differentiation	237	1.56212e-4	6.88122e-3	3.2593	14	0.37%	411	1.78149e-2	3.8371	6	7	0.15%
		regulation of digestive system process	310	3.47810e-4	1.17133e-2	2.2692	23	0.61%	490	3.80719e-2	2.2383	13	26	0.32%
		regulation of transcription from RNA polymerase II promoter involved in heart development	313	3.60531e-4	1.20254e-2	2.2632	23	0.61%	298	5.42319e-3	3.3575	9	12	0.22%
		substrate adhesion-dependent cell spreading	318	3.80054e-4	1.24772e-2	2.1694	25	0.66%	451	2.77143e-2	2.2383	14	28	0.35%
		homotypic cell-cell adhesion	321	3.82391e-4	1.24367e-2	2.0352	29	0.77%	454	2.84713e-2	2.1661	15	31	0.37%
		positive regulation of monooxygenase activity	326	4.04112e-4	1.29415e-2	2.3453	21	0.55%	467	3.33923e-2	2.4622	11	20	0.27%
		paraxial mesoderm morphogenesis	338	4.92371e-4	1.52081e-2	2.7777	15	0.40%	389	1.41042e-2	3.2558	8	11	0.20%
		granulocyte differentiation	350	5.45474e-4	1.62707e-2	2.6460	16	0.42%	493	3.83877e-2	2.6860	9	15	0.22%
		parasympathetic nervous system development	362	6.25125e-4	1.80285e-2	2.3195	20	0.53%	340	9.16169e-3	2.9844	10	15	0.25%
		preganglionic parasympathetic nervous system development	472	1.57264e-3	3.47848e-2	2.3849	16	0.42%	369	1.13995e-2	3.0992	9	13	0.22%
	Disease Ontology	allergic conjunctivitis	38	1.75251e-7	1.03075e-5	9.5033	10	0.26%	134	4.14809e-2	4.4767	4	4	0.10%
		encephalomyelitis	92	7.61826e-5	1.85074e-3	2.9259	18	0.48%	138	4.06087e-2	2.3449	11	21	0.27%
		insulinoma	93	7.92851e-5	1.90540e-3	2.5213	23	0.61%	128	3.88789e-2	2.4870	10	18	0.25%
		keratoacanthoma	108	1.57250e-4	3.25421e-3	2.6690	19	0.50%	112	3.61742e-2	2.6860	9	15	0.22%
		dengue disease	122	2.82007e-4	5.16627e-3	2.6237	18	0.48%	93	2.41230e-2	2.4418	12	22	0.30%
21	GO Molecular Function	thrombin receptor activity	49	1.78948e-4	1.34686e-2	9.9075	5	0.23%	6	2.53045e-2	7.5296	5	5	0.21%
	GO Biological Process	hormone biosynthetic process	6	4.52472e-15	7.87302e-12	4.4642	42	1.93%	231	4.16091e-2	2.4515	14	43	0.58%
		heart valve development	81	9.70716e-7	1.25114e-4	2.5947	34	1.56%	104	3.29824e-3	3.3754	13	29	0.54%
		positive regulation of gliogenesis	114	5.21197e-6	4.77306e-4	2.5158	31	1.42%	157	1.56749e-2	2.8790	13	34	0.54%
		heart valve morphogenesis	143	1.50797e-5	1.10093e-3	2.4632	29	1.33%	126	6.08284e-3	3.3465	12	27	0.50%
		positive regulation of glial cell differentiation	145	1.92024e-5	1.38257e-3	2.5248	27	1.24%	133	8.19863e-3	3.4511	11	24	0.46%
		ventricular septum morphogenesis	192	1.24127e-4	6.74940e-3	2.0876	32	1.47%	197	2.86316e-2	2.9581	11	28	0.46%
		thrombin receptor signaling pathway	198	1.51758e-4	8.00181e-3	6.3360	7	0.32%	137	9.15276e-3	5.6472	6	8	0.25%
		activation of Janus kinase activity	211	1.89536e-4	9.37797e-3	5.2386	8	0.37%	172	1.88423e-2	7.5296	4	4	0.17%
		activation of Rac GTPase activity	312	1.46697e-3	4.90872e-2	3.4642	9	0.41%	211	3.50804e-2	4.5178	6	10	0.25%
22	GO Molecular Function	receptor agonist activity	19	2.47555e-8	4.80518e-6	2.6145	44	0.55%	82	3.44402e-2	2.4098	11	15	0.20%
	GO Biological Process	dorsal spinal cord development	1	3.63998e-21	3.80014e-17	3.4311	84	1.05%	343	2.82339e-5	2.6887	18	22	0.33%
		spinal cord association neuron differentiation	2	4.71491e-18	2.46118e-14	3.7996	62	0.78%	422	2.54560e-4	2.8480	13	15	0.24%
		mechanosensory behavior	54	1.45321e-9	2.80954e-7	2.9298	43	0.54%	532	1.43794e-3	3.2862	8	8	0.15%
		positive regulation of smoothened signaling pathway	58	1.87783e-9	3.38010e-7	2.4450	58	0.73%	510	1.04831e-3	2.4646	15	20	0.27%
		neural tube patterning	60	2.21076e-9	3.84672e-7	2.0625	83	1.04%	384	1.03903e-4	2.2904	23	33	0.42%
		mesonephric tubule development	62	3.04183e-9	5.12205e-7	2.8150	44	0.55%	1056	4.42353e-2	2.2750	9	13	0.16%
		mesonephric duct development	64	3.91881e-9	6.39255e-7	3.1203	37	0.46%	1070	4.56979e-2	2.5559	7	9	0.13%
		optic nerve development	77	1.97834e-8	2.68232e-6	2.9788	36	0.45%	1070	4.56979e-2	2.5559	7	9	0.13%
		cerebral cortex neuron differentiation	82	2.35132e-8	2.99363e-6	2.3091	56	0.70%	398	1.37586e-4	2.7385	15	18	0.27%
		positive regulation of branching involved in ureteric bud morphogenesis	108	7.98792e-8	7.72166e-6	2.2413	55	0.69%	979	3.42302e-2	2.0755	12	19	0.22%
		collecting duct development	114	9.23685e-8	8.45901e-6	2.7480	37	0.46%	369	5.82202e-5	3.2862	11	11	0.20%
		anatomical structure regression	132	2.59140e-7	2.04956e-5	3.2144	27	0.34%	757	8.92893e-3	2.6887	9	11	0.16%
		response to lithium ion	135	2.76447e-7	2.13786e-5	2.2913	48	0.60%	822	1.46110e-2	2.0538	15	24	0.27%
		cerebellar Purkinje cell-granule cell precursor cell signaling involved in regulation of granule cell precursor cell proliferation	140	3.70867e-7	2.76561e-5	3.1541	27	0.34%	783	1.05678e-2	3.2862	6	6	0.11%
		negative regulation of Notch signaling pathway	157	1.12579e-6	7.48611e-5	2.4696	37	0.46%	588	2.26616e-3	2.4214	14	19	0.26%
		neurological system process involved in regulation of systemic arterial blood pressure	165	1.26358e-6	7.99500e-5	2.1476	49	0.61%	580	2.17230e-3	2.5129	13	17	0.24%
		metanephric collecting duct development	167	1.45623e-6	9.10360e-5	3.0033	26	0.33%	655	3.84136e-3	3.2862	7	7	0.13%
		lens fiber cell development	187	2.68162e-6	1.49712e-4	2.4442	35	0.44%	894	2.20331e-2	2.4646	9	12	0.16%
		extracellular matrix assembly	195	3.67410e-6	1.96706e-4	2.4446	34	0.43%	477	6.45371e-4	2.8167	12	14	0.22%
		positive regulation of cerebellar granule cell precursor proliferation	236	9.26746e-6	4.09967e-4	2.4915	30	0.38%	1070	4.56979e-2	2.5559	7	9	0.13%
	Disease Ontology	inflammatory and toxic neuropathy	62	2.93075e-5	1.05649e-3	4.3948	12	0.15%	152	1.16541e-2	3.2862	6	6	0.11%
		diabetic polyneuropathy	78	6.12646e-5	1.75547e-3	4.4009	11	0.14%	190	3.06572e-2	3.2862	5	5	0.09%
		acoustic neuroma	97	2.18346e-4	5.03096e-3	2.1106	29	0.36%	177	2.22120e-2	2.6289	8	10	0.15%
	BioCyc Pathway	chondroitin sulfate biosynthesis (late stages)	2	6.04211e-7	1.00299e-4	2.3749	42	0.53%	2	9.70968e-4	3.0334	12	13	0.22%
	MSigDB Pathway	Genes involved in Class B/2 (Secretin family receptors)	1	4.70203e-19	6.20668e-16	2.2662	150	1.88%	3	1.14745e-7	2.0775	55	87	1.00%
		Hedgehog signaling pathway	2	8.30714e-16	5.48271e-13	2.1241	141	1.76%	2	5.09495e-9	2.4646	42	56	0.77%
		Genes involved in Collagen formation	3	1.88742e-15	8.30464e-13	2.1206	138	1.73%	10	4.37260e-5	2.0755	36	57	0.66%
		Genes involved in NCAM1 interactions	8	7.55533e-12	1.24663e-9	2.2000	94	1.18%	14	3.09200e-4	2.1908	26	39	0.47%
		Genes involved in Chondroitin sulfate biosynthesis	27	3.29452e-6	1.61066e-4	2.1697	44	0.55%	31	5.43475e-3	2.4214	14	19	0.26%
		Genes involved in Tandem pore domain potassium channels	29	4.96981e-6	2.26212e-4	2.6252	29	0.36%	61	4.08278e-2	2.4646	9	12	0.16%
23	GO Molecular Function	extracellular matrix binding	8	7.94879e-10	3.66439e-7	2.7505	49	1.31%	24	5.33961e-3	2.3406	21	41	0.53%
	GO Biological Process	regulation of cell aging	88	2.51194e-7	2.98008e-5	3.3039	26	0.70%	736	1.76921e-2	2.5133	11	20	0.28%
		protein trimerization	92	2.78254e-7	3.15758e-5	3.2857	26	0.70%	757	2.05188e-2	2.1420	15	32	0.38%
		negative regulation of osteoblast differentiation	118	8.45276e-7	7.47854e-5	2.3124	43	1.15%	419	1.05375e-3	2.4925	18	33	0.46%
		regulation of cellular senescence	133	1.52313e-6	1.19560e-4	3.2557	23	0.62%	719	1.59181e-2	3.0464	8	12	0.20%
		negative regulation of macrophage activation	136	1.61520e-6	1.23990e-4	7.4100	10	0.27%	865	2.96630e-2	3.8080	5	6	0.13%
		positive regulation of DNA binding	138	1.66879e-6	1.26248e-4	2.3592	39	1.05%	694	1.45248e-2	2.2848	14	28	0.35%
		positive regulation of fatty acid oxidation	140	1.72260e-6	1.28457e-4	2.9716	26	0.70%	719	1.59181e-2	3.0464	8	12	0.20%
		regulation of interleukin-13 production	156	2.59247e-6	1.73496e-4	3.7962	18	0.48%	308	7.45959e-5	4.1542	10	11	0.25%
		mating	179	5.07143e-6	2.95786e-4	2.4035	34	0.91%	419	1.05375e-3	2.4925	18	33	0.46%
		regulation of fatty acid oxidation	210	1.04745e-5	5.20732e-4	2.5175	29	0.78%	920	3.83854e-2	2.2848	11	22	0.28%
		response to protozoan	261	2.53436e-5	1.01374e-3	3.0763	19	0.51%	654	1.11592e-2	2.6456	11	19	0.28%
		regulation of monocyte differentiation	275	2.98697e-5	1.13396e-3	3.8224	14	0.38%	766	2.07643e-2	3.1988	7	10	0.18%
		branching involved in mammary gland duct morphogenesis	290	3.66915e-5	1.32089e-3	2.1481	35	0.94%	829	2.79729e-2	2.2848	12	24	0.30%
	GO Cellular Component	anchoring collagen	72	1.10559e-3	1.94245e-2	2.5594	15	0.40%	28	6.90910e-3	3.6557	8	10	0.20%
	Disease Ontology	myelofibrosis	45	9.16095e-8	4.54994e-6	2.1572	59	1.58%	123	2.99171e-4	2.2848	24	48	0.61%
		chronic myeloproliferative disease	57	2.70994e-7	1.06258e-5	2.4785	41	1.10%	186	7.87945e-3	2.2156	16	33	0.41%
		primary myelofibrosis	78	2.40936e-6	6.90375e-5	2.3837	37	0.99%	168	4.83636e-3	2.4606	14	26	0.35%
		Hantavirus infectious disease	88	4.82258e-6	1.22482e-4	2.9472	24	0.64%	204	1.70076e-2	2.7418	9	15	0.23%
		malignant neoplasm of lung	242	1.55720e-3	1.43816e-2	2.1459	20	0.54%	260	4.48235e-2	2.1855	11	23	0.28%
		alcohol abuse	258	2.38578e-3	2.06675e-2	2.5468	13	0.35%	196	1.25009e-2	3.0464	8	12	0.20%
		strabismus	271	3.39363e-3	2.79881e-2	2.3493	14	0.38%	256	4.32398e-2	3.0464	6	9	0.15%
	MSigDB Pathway	Genes involved in NCAM1 interactions	22	4.81958e-5	2.89175e-3	2.0043	40	1.07%	27	3.17300e-2	2.1091	18	39	0.46%
24	GO Molecular Function	transcription regulatory region sequence-specific DNA binding	6	3.71810e-29	2.28539e-26	2.1541	260	5.60%	8	5.76547e-12	2.2842	79	168	2.13%
		HMG box domain binding	18	2.66685e-13	5.46407e-11	3.3863	51	1.10%	17	1.77039e-5	3.8349	15	19	0.40%
		core promoter proximal region DNA binding	22	1.15124e-10	1.92990e-8	2.1630	86	1.85%	43	4.07077e-3	2.2345	23	50	0.62%
		core promoter proximal region sequence-specific DNA binding	23	3.16619e-10	5.07692e-8	2.1387	84	1.81%	52	7.67116e-3	2.1809	22	49	0.59%
		enhancer sequence-specific DNA binding	29	2.76845e-8	3.52070e-6	2.2384	59	1.27%	40	3.96428e-3	2.6800	16	29	0.43%
		enhancer binding	30	2.81113e-8	3.45582e-6	2.2033	61	1.31%	46	6.34997e-3	2.5024	17	33	0.46%
		E-box binding	33	4.27728e-8	4.78018e-6	2.4707	47	1.01%	59	1.22936e-2	2.5125	15	29	0.40%
		RNA polymerase II distal enhancer sequence-specific DNA binding	43	3.82798e-7	3.28316e-5	2.9980	29	0.62%	77	2.99566e-2	2.8574	10	17	0.27%
		receptor agonist activity	55	1.18181e-5	7.92458e-4	2.6592	26	0.56%	56	9.56817e-3	3.2384	10	15	0.27%
		frizzled binding	63	1.84249e-5	1.07859e-3	2.1202	39	0.84%	60	1.23901e-2	2.3594	17	35	0.46%
	GO Biological Process	dorsal spinal cord development	26	2.55142e-26	1.02449e-23	4.9215	70	1.51%	245	7.96985e-7	3.7536	17	22	0.46%
		spinal cord association neuron differentiation	28	8.44138e-26	3.14743e-23	6.0126	57	1.23%	345	4.19120e-5	3.8861	12	15	0.32%
		cranial nerve formation	35	4.99913e-23	1.49117e-20	12.7537	30	0.65%	806	2.32345e-2	4.8576	4	4	0.11%
		cell differentiation in spinal cord	44	5.38845e-21	1.27853e-18	2.7249	117	2.52%	152	4.00820e-11	3.3031	34	50	0.92%
		cell fate specification	45	7.12310e-21	1.65256e-18	2.4190	144	3.10%	88	4.55136e-16	3.4377	46	65	1.24%
		neuron fate commitment	51	1.23653e-18	2.53125e-16	2.3846	131	2.82%	97	1.86650e-15	3.4473	44	62	1.18%
		cranial nerve development	52	7.85736e-18	1.57752e-15	2.6770	101	2.18%	108	2.80496e-14	3.7781	35	45	0.94%
		spinal cord development	53	1.02663e-17	2.02227e-15	2.1700	151	3.25%	131	3.14851e-12	2.8336	49	84	1.32%
		embryonic skeletal system morphogenesis	63	2.75439e-16	4.56441e-14	2.1753	137	2.95%	128	1.40596e-12	2.8152	51	88	1.37%
		preganglionic parasympathetic nervous system development	64	2.89956e-16	4.72990e-14	4.9871	41	0.88%	209	5.85947e-8	4.8576	13	13	0.35%
		mesodermal cell fate specification	65	2.98602e-16	4.79601e-14	8.7087	26	0.56%	501	1.58109e-3	4.8576	6	6	0.16%
		midbrain development	72	1.40762e-15	2.04105e-13	3.1620	67	1.44%	266	3.78776e-6	3.0912	21	33	0.57%
		neuron fate specification	85	1.30427e-14	1.60195e-12	2.6972	80	1.72%	177	1.16783e-9	3.8526	23	29	0.62%
		cranial nerve morphogenesis	87	1.98579e-14	2.38295e-12	3.2559	59	1.27%	229	2.40183e-7	3.9323	17	21	0.46%
		nerve development	89	2.40130e-14	2.81681e-12	2.1518	122	2.63%	123	6.98669e-13	3.0976	44	69	1.18%
		midbrain-hindbrain boundary development	90	2.48997e-14	2.88837e-12	5.7909	31	0.67%	449	5.48452e-4	4.3178	8	9	0.22%
		mesodermal cell fate commitment	102	1.48307e-13	1.51797e-11	4.5146	37	0.80%	667	7.46802e-3	3.1227	9	14	0.24%
		parasympathetic nervous system development	105	2.20999e-13	2.19736e-11	3.9749	42	0.90%	221	1.37950e-7	4.5337	14	15	0.38%
		rostrocaudal neural tube patterning	108	2.34897e-13	2.27067e-11	4.8225	34	0.73%	340	3.71936e-5	4.4160	10	11	0.27%
		cell fate determination	111	3.82206e-13	3.59481e-11	2.3329	93	2.00%	236	4.33836e-7	3.0360	25	40	0.67%
	Disease Ontology	sensorineural hearing loss	22	2.00247e-17	2.03433e-15	3.6278	63	1.36%	56	3.14622e-5	2.5838	25	47	0.67%
		inner ear disease	34	1.14959e-14	7.55685e-13	2.7241	79	1.70%	50	1.09982e-5	2.3914	32	65	0.86%
		cranial nerve disease	67	4.52413e-9	1.50917e-7	2.1244	74	1.59%	66	1.51898e-4	2.1824	31	69	0.83%
		osteopetrosis	102	1.99565e-7	4.37282e-6	3.8133	22	0.47%	77	6.05368e-4	3.7366	10	13	0.27%
		ocular motility disease	120	1.03279e-6	1.92358e-5	2.1611	49	1.06%	93	1.96059e-3	2.3665	19	39	0.51%
		osteosclerosis	132	3.56572e-6	6.03741e-5	3.0031	24	0.52%	107	4.32840e-3	2.9685	11	18	0.30%
		lung small cell carcinoma	216	1.28475e-4	1.32936e-3	2.0122	35	0.75%	169	3.70644e-2	2.1775	13	29	0.35%
		craniosynostosis	353	4.22666e-3	2.67609e-2	2.0453	18	0.39%	187	4.27044e-2	3.2384	6	9	0.16%
	MSigDB Pathway	Genes involved in Tandem pore domain potassium channels	40	1.13068e-6	3.73125e-5	3.4279	22	0.47%	33	2.84396e-2	3.2384	8	12	0.22%
		Wnt signaling network	56	6.81770e-5	1.60703e-3	2.0123	38	0.82%	2	4.29302e-4	3.1227	18	28	0.48%
26	GO Biological Process	platelet degranulation	154	1.98678e-4	1.34688e-2	2.8914	16	2.26%	81	2.35279e-2	3.0321	14	85	1.43%
		commitment of multipotent stem cells to neuronal lineage in forebrain	172	2.97900e-4	1.80818e-2	23.9287	3	0.42%	75	2.22473e-2	18.4092	3	3	0.31%
		neuron fate commitment	239	1.00506e-3	4.39029e-2	2.2709	19	2.69%	112	4.24949e-2	3.2661	11	62	1.12%
		cell fate specification	245	1.05887e-3	4.51209e-2	2.2059	20	2.83%	78	2.30548e-2	3.3986	12	65	1.22%
	GO Cellular Component	AP-type membrane coat adaptor complex	31	3.42873e-4	1.39914e-2	4.2581	9	1.27%	9	4.04640e-2	4.0410	9	41	0.92%
28	GO Molecular Function	voltage-gated calcium channel activity	17	2.95211e-20	6.40435e-18	2.4805	134	1.47%	21	6.33018e-3	2.0005	24	35	0.39%
	GO Biological Process	ventral spinal cord interneuron fate commitment	42	1.56392e-42	3.88745e-40	5.1180	112	1.23%	511	3.50654e-2	2.3869	9	11	0.15%
		ventral spinal cord interneuron differentiation	49	8.16659e-37	1.73998e-34	4.3074	115	1.26%	539	4.05361e-2	2.2441	10	13	0.16%
		neuron fate specification	123	3.35619e-19	2.84867e-17	2.3711	138	1.51%	298	5.06508e-3	2.0120	20	29	0.32%
		spinal cord motor neuron differentiation	169	1.06401e-15	6.57294e-14	2.1518	136	1.49%	263	2.86122e-3	2.0057	22	32	0.36%
		spinal cord motor neuron cell fate specification	215	1.39611e-13	6.77924e-12	2.8639	67	0.74%	415	1.75800e-2	2.4311	10	12	0.16%
		negative regulation of cell fate commitment	220	1.90158e-13	9.02386e-12	3.1237	58	0.64%	539	4.05361e-2	2.2441	10	13	0.16%
		female meiosis	435	6.62954e-8	1.59109e-6	2.7421	38	0.42%	399	1.48004e-2	2.0838	15	21	0.24%
		catecholamine transport	513	8.76922e-7	1.78461e-5	2.5344	36	0.40%	511	3.50654e-2	2.3869	9	11	0.15%
		MHC class II protein complex	27	3.79100e-21	1.77615e-19	8.2627	36	0.40%	34	1.95312e-2	2.1496	14	19	0.23%
		acetylcholine-gated channel complex	72	5.38386e-8	9.45914e-7	2.8104	37	0.41%	42	3.15902e-2	2.1880	12	16	0.19%
	Disease Ontology	Brugada syndrome	57	1.72660e-9	6.77009e-8	3.2851	36	0.40%	80	4.52427e-2	2.9174	6	6	0.10%
		epidermolysis bullosa simplex	259	3.65655e-3	3.15536e-2	2.6567	11	0.12%	80	4.52427e-2	2.9174	6	6	0.10%
	MSigDB Cancer Neighborhood	Neighborhood of CDH11	2	7.82591e-21	1.67083e-18	2.8412	109	1.20%	3	1.87680e-2	2.1005	18	25	0.29%
	MSigDB Pathway	Genes involved in Presynaptic nicotinic acetylcholine receptors	11	4.44173e-12	5.33007e-10	5.6828	26	0.29%	24	3.84352e-2	2.4311	10	12	0.16%
		Genes involved in Acetylcholine Binding And Downstream Events	40	6.08671e-8	2.00862e-6	3.2868	29	0.32%	21	2.40015e-2	2.3339	12	15	0.19%
		Genes involved in Highly calcium permeable postsynaptic nicotinic acetylcholine receptors	42	8.67110e-8	2.72520e-6	3.3130	28	0.31%	13	6.37959e-3	2.6743	11	12	0.18%
29	GO Biological Process	positive regulation of neurotransmitter transport	150	3.83106e-7	2.66642e-5	4.8842	16	0.49%	630	1.98653e-2	3.3225	7	10	0.18%
		regulation of sodium ion transport	173	1.61984e-6	9.77522e-5	2.1230	49	1.51%	128	5.65462e-7	2.8091	29	49	0.76%
		ventral spinal cord interneuron specification	223	1.10880e-5	5.19098e-4	2.9570	22	0.68%	410	2.92550e-3	3.7971	8	10	0.21%
		thyroid gland development	233	1.33036e-5	5.96094e-4	3.2271	19	0.59%	551	9.38307e-3	2.7479	11	19	0.29%
		regulation of extrinsic apoptotic signaling pathway in absence of ligand	248	1.96601e-5	8.27628e-4	2.4752	28	0.86%	566	1.13363e-2	2.1808	17	37	0.45%
		ventral spinal cord interneuron fate commitment	254	2.14356e-5	8.81054e-4	2.8290	22	0.68%	508	7.04814e-3	3.4519	8	11	0.21%
		metanephric nephron tubule morphogenesis	266	2.74431e-5	1.07709e-3	3.4600	16	0.49%	672	2.55056e-2	3.5598	6	8	0.16%
		negative regulation of lipid biosynthetic process	282	4.08964e-5	1.51404e-3	2.2565	31	0.96%	606	1.63041e-2	2.1698	16	35	0.42%
	Disease Ontology	gallbladder adenocarcinoma	159	1.20564e-3	1.69472e-2	2.8996	12	0.37%	168	1.11510e-2	3.1643	8	12	0.21%
		embryonal rhabdomyosarcoma	214	3.81261e-3	3.98186e-2	2.0657	18	0.56%	184	1.68548e-2	2.6369	10	18	0.26%
	PANTHER Pathway	Opioid proopiomelanocortin pathway	4	6.87919e-5	2.61409e-3	2.4870	24	0.74%	10	4.91490e-2	2.0765	14	32	0.37%
	MSigDB Pathway	Ceramide signaling pathway	3	1.35473e-8	5.96083e-6	2.8215	40	1.24%	11	1.27535e-2	2.1754	22	48	0.58%
		Bladder cancer	6	9.50982e-8	2.09216e-5	2.8855	34	1.05%	18	2.79691e-2	2.1472	19	42	0.50%
		Signaling events mediated by VEGFR1 and VEGFR2	19	1.26366e-5	8.77908e-4	2.0110	46	1.42%	7	4.29032e-3	2.0636	30	69	0.79%
		FAS (CD95) signaling pathway	21	1.48177e-5	9.31400e-4	2.4251	30	0.93%	12	1.24666e-2	2.3123	19	39	0.50%
		TRAIL signaling pathway	35	5.89171e-5	2.22201e-3	2.7111	21	0.65%	34	3.91533e-2	2.2914	14	29	0.37%
		Genes involved in GPVI-mediated activation cascade	47	1.93673e-4	5.43934e-3	2.2304	26	0.80%	32	4.06715e-2	2.2249	15	32	0.39%
		The 4-1BB-dependent immune response	77	8.12144e-4	1.39225e-2	2.7520	14	0.43%	26	3.85730e-2	2.7920	10	17	0.26%
		Nephrin/Neph1 signaling in the kidney podocyte	83	9.36499e-4	1.48937e-2	2.0326	25	0.77%	32	4.06715e-2	2.2249	15	32	0.39%
30	GO Biological Process	regulation of protein ubiquitination involved in ubiquitin-dependent protein catabolic process	367	1.45502e-5	4.13908e-4	2.3180	33	0.34%	179	2.61994e-3	2.1203	15	16	0.19%
		positive regulation of protein ubiquitination involved in ubiquitin-dependent protein catabolic process	510	1.57118e-4	3.21631e-3	2.1882	28	0.29%	186	3.11982e-3	2.2616	12	12	0.15%
	GO Cellular Component	ESC/E(Z) complex	88	1.70155e-5	2.44597e-4	2.2075	36	0.38%	32	1.69157e-2	2.0877	12	13	0.15%
31	GO Biological Process	hindgut morphogenesis	74	3.36585e-14	4.74858e-12	2.7578	75	0.69%	632	2.98577e-2	2.2017	8	8	0.10%
		ventral spinal cord interneuron fate commitment	85	1.01356e-13	1.24490e-11	2.7612	72	0.66%	671	3.74403e-2	2.0016	10	11	0.12%
		ventral spinal cord interneuron differentiation	159	4.78474e-11	3.14168e-9	2.3576	75	0.69%	514	1.17716e-2	2.0324	12	13	0.15%
		spinal cord motor neuron cell fate specification	379	3.98199e-7	1.09689e-5	2.0806	58	0.53%	575	2.15079e-2	2.0183	11	12	0.13%
	Disease Ontology	congenital diaphragmatic hernia	75	4.36756e-7	1.30153e-5	2.1383	54	0.50%	89	1.45541e-2	2.0324	12	13	0.15%
32	GO Biological Process	regulation of cytokine secretion involved in immune response	35	8.08517e-13	2.41169e-10	6.7663	24	0.60%	719	2.50854e-2	3.5273	6	8	0.16%
		activation of Rho GTPase activity	36	8.30241e-13	2.40770e-10	4.1508	38	0.95%	436	2.99109e-3	2.7791	13	22	0.34%
		positive regulation of Rho GTPase activity	73	7.50563e-11	1.07341e-8	2.2415	81	2.03%	298	1.78988e-4	2.0576	35	80	0.91%
		lymphocyte migration	84	1.61386e-10	2.00579e-8	3.7614	34	0.85%	628	1.60784e-2	2.5867	11	20	0.29%
		regulation of glomerular filtration	90	2.53569e-10	2.94140e-8	7.6745	17	0.43%	890	4.98338e-2	3.1354	6	9	0.16%
		negative regulation of interleukin-6 production	103	8.34283e-10	8.45622e-8	4.5936	25	0.63%	784	3.40647e-2	2.4753	10	19	0.26%
		positive regulation of fibroblast proliferation	107	1.17556e-9	1.14699e-7	2.4725	58	1.45%	389	1.47591e-3	2.2969	21	43	0.55%
		activation of Ras GTPase activity	138	5.93511e-9	4.49004e-7	2.7092	45	1.13%	295	1.61043e-4	2.8218	18	30	0.47%
		thymic T cell selection	144	7.64581e-9	5.54321e-7	3.2164	34	0.85%	550	1.02196e-2	2.7228	11	19	0.29%
		thyroid gland development	165	1.46789e-8	9.28777e-7	3.7176	27	0.68%	550	1.02196e-2	2.7228	11	19	0.29%
		lymphocyte chemotaxis	190	3.68528e-8	2.02496e-6	4.0516	23	0.58%	840	4.46768e-2	2.6875	8	14	0.21%
		cochlea morphogenesis	225	1.04100e-7	4.83024e-6	2.5739	41	1.03%	798	3.47820e-2	2.3515	11	22	0.29%
		lateral sprouting from an epithelium	236	1.47491e-7	6.52459e-6	2.9428	32	0.80%	439	3.03054e-3	4.1152	7	8	0.18%
	Disease Ontology	familial hypercholesterolemia	13	5.98478e-12	1.02892e-9	4.9809	29	0.73%	171	3.02475e-3	2.6583	13	23	0.34%
		epidermolysis bullosa	57	2.00810e-7	7.87388e-6	3.6750	23	0.58%	184	4.28829e-3	2.6875	12	21	0.31%
		rheumatic disease of mitral valve	105	3.30334e-6	7.03141e-5	5.4909	12	0.30%	249	1.92231e-2	3.9192	5	6	0.13%
		chronic myeloproliferative disease	142	1.78185e-5	2.80454e-4	2.1470	38	0.95%	190	5.49404e-3	2.2803	16	33	0.42%
		polydactyly	153	4.03542e-5	5.89488e-4	2.5199	25	0.63%	297	4.72342e-2	2.5083	8	15	0.21%
		disseminated neuroblastoma	161	5.47613e-5	7.60196e-4	5.4826	9	0.23%	246	1.85472e-2	4.7031	4	4	0.10%
		malignant neoplasm of lung	189	1.12541e-4	1.33085e-3	2.4068	24	0.60%	274	3.36537e-2	2.2493	11	23	0.29%
		neonatal hypothyroidism	198	1.54593e-4	1.74503e-3	3.2629	14	0.35%	259	2.46086e-2	2.9929	7	11	0.18%
		ependymoma	201	1.67952e-4	1.86752e-3	2.9524	16	0.40%	287	4.35466e-2	2.7435	7	12	0.18%
		capillary hemangioma	220	2.87607e-4	2.92183e-3	3.0660	14	0.35%	275	3.45269e-2	3.1354	6	9	0.16%
		mitral valve disease	261	8.68559e-4	7.43766e-3	2.5300	16	0.40%	221	1.26199e-2	2.8218	9	15	0.23%
	MSigDB Pathway	Genes involved in NRAGE signals death through JNK	8	9.71141e-8	1.60238e-5	2.2620	53	1.33%	23	3.55708e-2	2.0781	19	43	0.50%
		Netrin-mediated signaling events	25	1.77794e-5	9.38751e-4	2.0783	41	1.03%	12	8.05401e-3	2.4985	17	32	0.44%
34	GO Molecular Function	kinesin binding	26	6.21566e-7	8.81667e-5	4.6982	16	0.86%	11	8.57299e-3	3.9254	11	22	0.48%
	GO Biological Process	midbrain-hindbrain boundary development	40	1.16903e-9	3.05116e-7	7.4835	16	0.86%	285	9.25402e-3	5.2338	6	9	0.26%
		rostrocaudal neural tube patterning	64	5.11527e-8	8.34429e-6	5.6821	16	0.86%	387	2.98267e-2	4.2822	6	11	0.26%
		positive regulation of T cell mediated cytotoxicity	78	2.23802e-7	2.99551e-5	5.0830	16	0.86%	259	6.92912e-3	3.3215	11	26	0.48%
		positive regulation of T cell mediated immunity	98	1.05333e-6	1.12212e-4	3.8626	19	1.02%	265	7.49340e-3	2.8182	14	39	0.61%
		antigen processing and presentation of exogenous peptide antigen via MHC class I, TAP-independent	145	6.31729e-6	4.54845e-4	10.5311	7	0.38%	405	3.45018e-2	4.9067	5	8	0.22%
		regulation of T cell mediated cytotoxicity	172	1.30234e-5	7.90488e-4	3.6796	16	0.86%	382	2.80663e-2	2.7857	11	31	0.48%
		positive regulation of adaptive immune response based on somatic recombination of immune receptors built from immunoglobulin superfamily domains	190	2.18099e-5	1.19840e-3	2.8213	22	1.19%	441	4.47452e-2	2.1657	16	58	0.70%
		granzyme-mediated apoptotic signaling pathway	195	2.27488e-5	1.21794e-3	15.4152	5	0.27%	456	4.72617e-2	7.8507	3	3	0.13%
		positive regulation of adaptive immune response	207	3.70798e-5	1.87011e-3	2.6503	23	1.24%	394	3.23812e-2	2.1879	17	61	0.74%
		regulation of T cell mediated immunity	216	5.30079e-5	2.56205e-3	2.8106	20	1.08%	400	3.34404e-2	2.3090	15	51	0.65%
		positive regulation of gliogenesis	244	9.31392e-5	3.98514e-3	2.3823	25	1.35%	198	1.71971e-3	3.2327	14	34	0.61%
		vesicle fusion	324	3.86346e-4	1.24489e-2	2.9714	14	0.76%	403	3.42670e-2	3.0720	9	23	0.39%
		positive regulation of glial cell differentiation	346	4.91446e-4	1.48286e-2	2.3058	21	1.13%	317	1.30064e-2	3.2711	10	24	0.44%
	GO Cellular Component	stereocilium	145	4.36943e-3	3.81195e-2	2.3649	13	0.70%	26	1.92147e-2	3.2711	10	24	0.44%
	Disease Ontology	anaplastic thyroid carcinoma	53	1.15582e-4	4.87409e-3	3.5497	13	0.70%	176	3.79617e-2	2.9908	8	21	0.35%
		esophageal carcinoma	68	2.42202e-4	7.96059e-3	2.3786	22	1.19%	182	4.57708e-2	2.1551	14	51	0.61%
		autoimmune disease of blood	162	3.33547e-3	4.60171e-2	2.4443	13	0.70%	180	4.40072e-2	2.7176	9	26	0.39%
	PANTHER Pathway	Histamine H1 receptor mediated signaling pathway	2	4.23223e-5	3.21649e-3	2.6268	23	1.24%	1	3.07181e-3	3.0637	16	41	0.70%
		Oxytocin receptor mediated signaling pathway	3	2.54348e-4	1.28870e-2	2.2703	24	1.29%	3	1.30072e-2	2.4715	17	54	0.74%
		Insulin/IGF pathway-mitogen activated protein kinase kinase/MAP kinase cascade	9	2.79990e-3	4.72873e-2	2.1825	17	0.92%	10	3.36341e-2	2.7072	10	29	0.44%
	MSigDB Pathway	C-MYB transcription factor network	21	1.13315e-5	7.12267e-4	2.0518	44	2.37%	3	1.30376e-2	2.3365	25	84	1.09%
		Presenilin action in Notch and Wnt signaling	98	1.97736e-3	2.66339e-2	2.0165	22	1.19%	10	3.84188e-2	2.6169	15	45	0.65%
		IGF1 pathway	112	2.97076e-3	3.50125e-2	2.1150	18	0.97%	4	1.07413e-2	3.4020	13	30	0.57%
35	GO Biological Process	blood coagulation, fibrin clot formation	6	5.71963e-10	9.95215e-7	4.2095	28	0.69%	449	4.86881e-2	2.2319	12	21	0.26%
		spinal cord patterning	74	1.00394e-4	1.41638e-2	2.1165	32	0.79%	311	1.59269e-2	2.4179	13	21	0.28%
		diaphragm development	144	6.42222e-4	4.65611e-2	2.7053	15	0.37%	306	1.52265e-2	3.4176	7	8	0.15%
36	GO Molecular Function	death receptor activity	105	2.93720e-5	1.03166e-3	2.4685	27	0.28%	87	4.30833e-2	2.1705	11	13	0.16%
	GO Biological Process	autophagic cell death	38	2.34890e-15	6.45330e-13	9.5361	23	0.24%	939	3.89717e-2	2.5652	6	6	0.09%
		cleavage furrow formation	361	1.27490e-5	3.68697e-4	3.3717	18	0.19%	790	1.80485e-2	2.5652	7	7	0.10%
		regulation of vitamin D biosynthetic process	370	1.42898e-5	4.03204e-4	2.9114	22	0.23%	910	3.59152e-2	2.2802	8	9	0.11%
		regulation of gene silencing by miRNA	401	2.39768e-5	6.24235e-4	2.9875	20	0.21%	910	3.59152e-2	2.2802	8	9	0.11%
		regulation of follicle-stimulating hormone secretion	532	1.72961e-4	3.39419e-3	2.3894	23	0.24%	939	3.89717e-2	2.5652	6	6	0.09%
		positive regulation of protein homooligomerization	817	1.60530e-3	2.05133e-2	2.3103	17	0.18%	910	3.59152e-2	2.2802	8	9	0.11%
	GO Cellular Component	MHC class I protein complex	12	1.37146e-10	1.44575e-8	4.8366	26	0.27%	70	4.02775e-2	2.1377	10	12	0.14%
	Disease Ontology	rheumatic disease of mitral valve	79	7.12881e-7	2.01682e-5	3.8108	20	0.21%	321	2.44055e-2	2.5652	6	6	0.09%
		amyotrophic neuralgia	89	1.38169e-6	3.46974e-5	3.3878	22	0.23%	260	1.17401e-2	2.5652	7	7	0.10%
		mediastinum cancer	222	5.61066e-4	5.64857e-3	2.2370	22	0.23%	221	5.38109e-3	2.5652	8	8	0.11%
	MSigDB Pathway	TACI and BCMA stimulation of B cell immune responses.	45	5.09224e-7	1.49372e-5	3.1020	27	0.28%	123	3.28721e-2	2.0155	11	14	0.16%
		Genes involved in TGF-beta receptor signaling in EMT (epithelial to mesenchymal transition)	111	1.12527e-4	1.33816e-3	2.1652	30	0.31%	123	3.28721e-2	2.0155	11	14	0.16%
37	GO Biological Process	ventral spinal cord interneuron differentiation	17	1.49005e-40	9.15063e-38	4.0895	135	1.20%	423	3.51732e-2	2.0975	11	13	0.15%
		negative regulation of gliogenesis	90	3.22302e-18	3.73871e-16	2.2185	150	1.33%	152	2.40694e-4	2.0515	24	29	0.33%
		negative regulation of glial cell differentiation	154	3.84364e-13	2.60569e-11	2.1477	112	0.99%	185	6.53234e-4	2.1408	19	22	0.26%
		cerebellar granule cell differentiation	348	1.15944e-7	3.47833e-6	2.6412	39	0.35%	443	4.09081e-2	2.4788	7	7	0.10%
		cerebellar granular layer morphogenesis	364	2.71184e-7	7.77793e-6	2.4836	41	0.36%	375	1.94842e-2	2.4788	8	8	0.11%
	GO Cellular Component	MHC class II protein complex	2	1.58785e-75	1.00432e-72	16.7062	90	0.80%	20	8.15833e-4	2.2179	17	19	0.23%
	Disease Ontology	holoprosencephaly	62	5.06721e-8	1.82665e-6	2.2375	57	0.51%	61	1.12404e-2	2.1483	13	15	0.18%
	MSigDB Cancer Neighborhood	Neighborhood of CDH11	4	1.57288e-24	1.67905e-22	2.8037	133	1.18%	1	4.02768e-3	2.0822	21	25	0.29%
