# Supplementary material for: Pan-cancer analysis of differential DNA methylation patterns
Source: BMC Med Genomics. 2020 Oct 22;13(Suppl 10):154. doi: 10.1186/s12920-020-00780-3 (PMC7579968; doi:10.1186/s12920-020-00780-3)
Supplement: Supplementary file 5 — Additional file 5 Table S6. Distribution of X-chromosome-located CpG sites in the 37 PanDM clusters. The proportion of X-chromosome-located CpG sites included in each cluster is also given. A hypergeometric test is conducted to investigate the significance of enrichment for the X-chromosome-located CpG sites in each PanDM cluster. The corresponding p-values and FDRs are recorded in the last two columns of the table. (Excel) [file 12920_2020_780_MOESM5_ESM.xlsx]

## Sheet: Supplementary_Table_6
PanDM_Cluster	Number_of_CpG	Number_of_X-CpG	Prop_All_X_(%)	Hyper_Pval	FDR
33	123147	2652	27.11	1	1
18	8417	2156	22.04	0	0
6	35809	924	9.45	0.0815735	0.377277
14	41341	516	5.28	1	1
31	10854	494	5.05	1.97411e-37	2.43474e-36
22	7990	275	2.81	4.93902e-08	3.65487e-07
13	2372	259	2.65	3.56666e-87	6.59833e-86
28	9109	252	2.58	0.0366355	0.193645
25	17371	243	2.48	1	1
37	11263	234	2.39	0.997563	1
24	4642	225	2.3	7.87758e-21	7.28676e-20
4	7389	207	2.12	0.0364793	0.193645
30	9587	190	1.94	0.999416	1
9	12998	157	1.61	1	1
17	8837	103	1.05	1	1
8	7410	101	1.03	1	1
36	9589	96	0.98	1	1
5	6145	83	0.85	1	1
10	5330	76	0.78	1	1
11	5999	68	0.7	1	1
3	6199	60	0.61	1	1
19	3965	47	0.48	1	1
7	4056	45	0.46	1	1
32	3993	39	0.4	1	1
35	4069	38	0.39	1	1
1	1803	34	0.35	0.957925	1
29	3237	27	0.28	1	1
23	3732	25	0.26	1	1
21	2177	24	0.25	0.999999	1
27	1239	21	0.21	0.973574	1
12	2891	20	0.2	1	1
15	2054	18	0.18	1	1
2	2821	17	0.17	1	1
20	3788	17	0.17	1	1
34	1854	16	0.16	1	1
16	1881	14	0.14	1	1
26	707	8	0.08	0.99627	1
